# Supplementary material for: Robustness of Mammalian Gut Microbiota to Humanization in Captivity
Source: Frontiers journal article supplement (doi:10.3389/fevo.2021.785089), 2022-01-03
Supplement: Table_1.XLSX [file Table_1.XLSX]

## Sheet: TableS1_metadata
SampleID	captive_wild	common_name	country	msw05_binomial	binomial_captive	mswfamilylatin	captive_wild_family
10936.FD.0168.cheetah	captive	Cheetah	France	Acinonyx jubatus	Acinonyx jubatus_captive	Felidae	other
10936.TS.031.cheetah	wild	Cheetah	South Africa	Acinonyx jubatus	Acinonyx jubatus_wild	Felidae	wild_Felidae
10936.TS.032.cheetah	wild	Cheetah	South Africa	Acinonyx jubatus	Acinonyx jubatus_wild	Felidae	wild_Felidae
10936.FD.01830.impala	captive	Impala	France	Aepyceros melampus	Aepyceros melampus_captive	Bovidae	captive_Bovidae
10936.FD.0238.impala	captive	Impala	France	Aepyceros melampus	Aepyceros melampus_captive	Bovidae	captive_Bovidae
10936.FD.0265.impala	captive	Impala	France	Aepyceros melampus	Aepyceros melampus_captive	Bovidae	captive_Bovidae
10936.TS.168.impala	wild	Impala	South Africa	Aepyceros melampus	Aepyceros melampus_wild	Bovidae	wild_Bovidae
10936.TS.170.impala	wild	Impala	South Africa	Aepyceros melampus	Aepyceros melampus_wild	Bovidae	wild_Bovidae
10936.TS.172.impala	wild	Impala	South Africa	Aepyceros melampus	Aepyceros melampus_wild	Bovidae	wild_Bovidae
10936.AC622.blackhowler	wild	Black howler	Argentina	Alouatta caraya	NA_wild	Atelidae	wild_Atelidae
10936.AC668.blackhowler	wild	Black howler	Argentina	Alouatta caraya	NA_wild	Atelidae	wild_Atelidae
10936.AC673.blackhowler	wild	Black howler	Argentina	Alouatta caraya	NA_wild	Atelidae	wild_Atelidae
10936.AC674.blackhowler	wild	Black howler	Argentina	Alouatta caraya	NA_wild	Atelidae	wild_Atelidae
10936.AC679.blackhowler	wild	Black howler	Argentina	Alouatta caraya	NA_wild	Atelidae	wild_Atelidae
10936.AC680.blackhowler	wild	Black howler	Argentina	Alouatta caraya	NA_wild	Atelidae	wild_Atelidae
10936.AC683.blackhowler	wild	Black howler	Argentina	Alouatta caraya	NA_wild	Atelidae	wild_Atelidae
10936.AC684.blackhowler	wild	Black howler	Argentina	Alouatta caraya	NA_wild	Atelidae	wild_Atelidae
10936.AC685.blackhowler	wild	Black howler	Argentina	Alouatta caraya	NA_wild	Atelidae	wild_Atelidae
10936.AC691.blackhowler	wild	Black howler	Argentina	Alouatta caraya	NA_wild	Atelidae	wild_Atelidae
10936.AC693.blackhowler	wild	Black howler	Argentina	Alouatta caraya	NA_wild	Atelidae	wild_Atelidae
10936.AC711.blackhowler	wild	Black howler	Argentina	Alouatta caraya	NA_wild	Atelidae	wild_Atelidae
10936.APAL36.mantledhowler	wild	Mantled howler	Nicaragua	Alouatta palliata	NA_wild	Atelidae	wild_Atelidae
10936.APAL37.mantledhowler	wild	Mantled howler	Nicaragua	Alouatta palliata	NA_wild	Atelidae	wild_Atelidae
10936.APAL38.mantledhowler	wild	Mantled howler	Nicaragua	Alouatta palliata	NA_wild	Atelidae	wild_Atelidae
10936.APAL39.mantledhowler	wild	Mantled howler	Nicaragua	Alouatta palliata	NA_wild	Atelidae	wild_Atelidae
10936.Apalw10.mantledhowler	wild	Mantled howler	Nicaragua	Alouatta palliata	NA_wild	Atelidae	wild_Atelidae
10936.Apalw13.mantledhowler	wild	Mantled howler	Nicaragua	Alouatta palliata	NA_wild	Atelidae	wild_Atelidae
10936.Apalw14.mantledhowler	wild	Mantled howler	Nicaragua	Alouatta palliata	NA_wild	Atelidae	wild_Atelidae
10936.Apalw19.mantledhowler	wild	Mantled howler	Nicaragua	Alouatta palliata	NA_wild	Atelidae	wild_Atelidae
10936.Apalw20.mantledhowler	wild	Mantled howler	Nicaragua	Alouatta palliata	NA_wild	Atelidae	wild_Atelidae
10936.Apalw23.mantledhowler	wild	Mantled howler	Nicaragua	Alouatta palliata	NA_wild	Atelidae	wild_Atelidae
10936.Apalw8.mantledhowler	wild	Mantled howler	Nicaragua	Alouatta palliata	NA_wild	Atelidae	wild_Atelidae
10936.Apalw9.mantledhowler	wild	Mantled howler	Nicaragua	Alouatta palliata	NA_wild	Atelidae	wild_Atelidae
10936.NATL.24659.howler	captive	black howler monkey	USA	Alouatta pigra	Alouatta pigra_captive	Atelidae	captive_Atelidae
10936.NATL.25028.howler	captive	black howler monkey	USA	Alouatta pigra	Alouatta pigra_captive	Atelidae	captive_Atelidae
10936.APF103.Gblackhowler	wild	Guatemalan black howler	Mexico	Alouatta pigra	Alouatta pigra_wild	Atelidae	wild_Atelidae
10936.APF104.Gblackhowler	wild	Guatemalan black howler	Mexico	Alouatta pigra	Alouatta pigra_wild	Atelidae	wild_Atelidae
10936.APF108.Gblackhowler	wild	Guatemalan black howler	Mexico	Alouatta pigra	Alouatta pigra_wild	Atelidae	wild_Atelidae
10936.APF109.Gblackhowler	wild	Guatemalan black howler	Mexico	Alouatta pigra	Alouatta pigra_wild	Atelidae	wild_Atelidae
10936.APF110.Gblackhowler	wild	Guatemalan black howler	Mexico	Alouatta pigra	Alouatta pigra_wild	Atelidae	wild_Atelidae
10936.APF113.Gblackhowler	wild	Guatemalan black howler	Mexico	Alouatta pigra	Alouatta pigra_wild	Atelidae	wild_Atelidae
10936.APF115.Gblackhowler	wild	Guatemalan black howler	Mexico	Alouatta pigra	Alouatta pigra_wild	Atelidae	wild_Atelidae
10936.APF116.Gblackhowler	wild	Guatemalan black howler	Mexico	Alouatta pigra	Alouatta pigra_wild	Atelidae	wild_Atelidae
10936.APF38.Gblackhowler	wild	Guatemalan black howler	Mexico	Alouatta pigra	Alouatta pigra_wild	Atelidae	wild_Atelidae
10936.APX.37.Gblackhowler	wild	Guatemalan black howler	Mexico	Alouatta pigra	Alouatta pigra_wild	Atelidae	wild_Atelidae
10936.APX19.Gblackhowler	wild	Guatemalan black howler	Mexico	Alouatta pigra	Alouatta pigra_wild	Atelidae	wild_Atelidae
10936.APX21.Gblackhowler	wild	Guatemalan black howler	Mexico	Alouatta pigra	Alouatta pigra_wild	Atelidae	wild_Atelidae
10936.APX38.Gblackhowler	wild	Guatemalan black howler	Mexico	Alouatta pigra	Alouatta pigra_wild	Atelidae	wild_Atelidae
10936.Asen1013.Vredhowler	wild	Venezuelan red howler	Colombia	Alouatta seniculus	NA_wild	Atelidae	wild_Atelidae
10936.Asen1019.Vredhowler	wild	Venezuelan red howler	Colombia	Alouatta seniculus	NA_wild	Atelidae	wild_Atelidae
10936.Asen1111.Vredhowler	wild	Venezuelan red howler	Colombia	Alouatta seniculus	NA_wild	Atelidae	wild_Atelidae
10936.Asen1118.Vredhowler	wild	Venezuelan red howler	Colombia	Alouatta seniculus	NA_wild	Atelidae	wild_Atelidae
10936.Asen685.Vredhowler	wild	Venezuelan red howler	Colombia	Alouatta seniculus	NA_wild	Atelidae	wild_Atelidae
10936.AsenLink1.Vredhowler	wild	Venezuelan red howler	Ecuador	Alouatta seniculus	NA_wild	Atelidae	wild_Atelidae
10936.AsenLink2.Vredhowler	wild	Venezuelan red howler	Ecuador	Alouatta seniculus	NA_wild	Atelidae	wild_Atelidae
10936.AsenLink3.Vredhowler	wild	Venezuelan red howler	Ecuador	Alouatta seniculus	NA_wild	Atelidae	wild_Atelidae
10936.AsenLink4.Vredhowler	wild	Venezuelan red howler	Ecuador	Alouatta seniculus	NA_wild	Atelidae	wild_Atelidae
10936.AsenLink5.Vredhowler	wild	Venezuelan red howler	Ecuador	Alouatta seniculus	NA_wild	Atelidae	wild_Atelidae
10936.FD.01980.springbok	captive	Springbok	France	Antidorcas marsupialis	Antidorcas marsupialis_captive	Bovidae	captive_Bovidae
10936.FD.0226.springbok	captive	Springbok	France	Antidorcas marsupialis	Antidorcas marsupialis_captive	Bovidae	captive_Bovidae
10936.FD.0428.springbok	captive	Springbok	France	Antidorcas marsupialis	Antidorcas marsupialis_captive	Bovidae	captive_Bovidae
10936.FD.0492.springbok	captive	Springbok	France	Antidorcas marsupialis	Antidorcas marsupialis_captive	Bovidae	captive_Bovidae
10936.FD.0501.springbok	captive	Springbok	France	Antidorcas marsupialis	Antidorcas marsupialis_captive	Bovidae	captive_Bovidae
10936.SpgbkW	wild	Springbok	Namibia	Antidorcas marsupialis	Antidorcas marsupialis_wild	Bovidae	wild_Bovidae
10936.TS.049.springbok	wild	Springbok	South Africa	Antidorcas marsupialis	Antidorcas marsupialis_wild	Bovidae	wild_Bovidae
10936.TS.050.springbok	wild	Springbok	South Africa	Antidorcas marsupialis	Antidorcas marsupialis_wild	Bovidae	wild_Bovidae
10936.TS.051.springbok	wild	Springbok	South Africa	Antidorcas marsupialis	Antidorcas marsupialis_wild	Bovidae	wild_Bovidae
10936.AtbelzLink1.spidermonkey	wild	Whitebellied spider monkey	Ecuador	Ateles belzebuth	NA_wild	Atelidae	wild_Atelidae
10936.AtbelzLink2.spidermonkey	wild	Whitebellied spider monkey	Ecuador	Ateles belzebuth	NA_wild	Atelidae	wild_Atelidae
10936.AtbelzLink3.spidermonkey	wild	Whitebellied spider monkey	Ecuador	Ateles belzebuth	NA_wild	Atelidae	wild_Atelidae
10936.AtbelzLink4.spidermonkey	wild	Whitebellied spider monkey	Ecuador	Ateles belzebuth	NA_wild	Atelidae	wild_Atelidae
10936.AtbelzLink5.spidermonkey	wild	Whitebellied spider monkey	Ecuador	Ateles belzebuth	NA_wild	Atelidae	wild_Atelidae
10936.FD.0481.monkey	captive	Blackheaded spider monkey	France	Ateles fusciceps	NA_captive	Atelidae	captive_Atelidae
10936.FD.0483.monkey	captive	Blackheaded spider monkey	France	Ateles fusciceps	NA_captive	Atelidae	captive_Atelidae
10936.Ahyb1000.spidermonkey	wild	Whitebellied spider monkey	Colombia	Ateles hybridus	NA_wild	Atelidae	wild_Atelidae
10936.Ahyb257.spidermonkey	wild	Whitebellied spider monkey	Colombia	Ateles hybridus	NA_wild	Atelidae	wild_Atelidae
10936.Ahyb411.spidermonkey	wild	Whitebellied spider monkey	Colombia	Ateles hybridus	NA_wild	Atelidae	wild_Atelidae
10936.FD.0099.wolf	captive	Wolf	France	Canis lupus	NA_captive	Canidae	captive_Canidae
10936.FD.0125	captive	Wolf	France	Canis lupus	NA_captive	Canidae	captive_Canidae
10936.FD.0295.wolf	captive	Iberian wolf	France	Canis lupus	NA_captive	Canidae	captive_Canidae
10936.ZU.18195.wolf	captive	Mongolian wolf	Switzerland	Canis lupus	NA_captive	Canidae	captive_Canidae
10936.FD.0031	captive	White rhinoceros	France	Ceratotherium simum	Ceratotherium simum_captive	Rhinocerotidae	captive_Rhinocerotidae
10936.FD.0034	captive	White rhinoceros	France	Ceratotherium simum	Ceratotherium simum_captive	Rhinocerotidae	captive_Rhinocerotidae
10936.FD.0037	captive	White rhinoceros	France	Ceratotherium simum	Ceratotherium simum_captive	Rhinocerotidae	captive_Rhinocerotidae
10936.TS.002.rhinoceros	wild	White rhino	South Africa	Ceratotherium simum	Ceratotherium simum_wild	Rhinocerotidae	wild_Rhinocerotidae
10936.TS.003.rhinoceros	wild	White rhino	South Africa	Ceratotherium simum	Ceratotherium simum_wild	Rhinocerotidae	wild_Rhinocerotidae
10936.TS.146.rhinoceros	wild	White rhino	South Africa	Ceratotherium simum	Ceratotherium simum_wild	Rhinocerotidae	wild_Rhinocerotidae
10936.ATL.24995.monkey	captive	Schmidts monkey	USA	Cercopithecus ascanius	Cercopithecus ascanius_captive	Cercopithecidae	captive_Cercopithecidae
10936.RC2068.redtailedmonkey	wild	Redtailed monkey	Uganda	Cercopithecus ascanius	Cercopithecus ascanius_wild	Cercopithecidae	wild_Cercopithecidae
10936.RT2013.redtailedmonkey	wild	Redtailed monkey	Uganda	Cercopithecus ascanius	Cercopithecus ascanius_wild	Cercopithecidae	wild_Cercopithecidae
10936.RT2017.redtailedmonkey	wild	Redtailed monkey	Uganda	Cercopithecus ascanius	Cercopithecus ascanius_wild	Cercopithecidae	wild_Cercopithecidae
10936.RT2019.redtailedmonkey	wild	Redtailed monkey	Uganda	Cercopithecus ascanius	Cercopithecus ascanius_wild	Cercopithecidae	wild_Cercopithecidae
10936.RT2021.redtailedmonkey	wild	Redtailed monkey	Uganda	Cercopithecus ascanius	Cercopithecus ascanius_wild	Cercopithecidae	wild_Cercopithecidae
10936.RT2048.redtailedmonkey	wild	Redtailed monkey	Uganda	Cercopithecus ascanius	Cercopithecus ascanius_wild	Cercopithecidae	wild_Cercopithecidae
10936.RT2050.redtailedmonkey	wild	Redtailed monkey	Uganda	Cercopithecus ascanius	Cercopithecus ascanius_wild	Cercopithecidae	wild_Cercopithecidae
10936.RT2135.redtailedmonkey	wild	Redtailed monkey	Uganda	Cercopithecus ascanius	Cercopithecus ascanius_wild	Cercopithecidae	wild_Cercopithecidae
10936.FD.0305.guenon	captive	Moustached guenon	France	Cercopithecus cephus	Cercopithecus cephus_captive	Cercopithecidae	captive_Cercopithecidae
10936.FD.0308.guenon	captive	Moustached guenon	France	Cercopithecus cephus	Cercopithecus cephus_captive	Cercopithecidae	captive_Cercopithecidae
10936.FD.0490.monkey	captive	De Brazzas monkey	France	Cercopithecus neglectus	NA_captive	Cercopithecidae	captive_Cercopithecidae
10936.ATL.24983.guenon	captive	Wolfs guenon	USA	Cercopithecus wolfi	NA_captive	Cercopithecidae	captive_Cercopithecidae
10936.ATL.24979.colobus	captive	black and white colobus	USA	Colobus angolensis	NA_captive	Cercopithecidae	captive_Cercopithecidae
10936.ATL.25003.colobus	captive	black and white colobus	USA	Colobus angolensis	NA_captive	Cercopithecidae	captive_Cercopithecidae
10936.FD.0482.colobus	captive	Black and white colobus	France	Colobus guereza	Colobus guereza_captive	Cercopithecidae	captive_Cercopithecidae
10936.BWC2023.mantledguereza	wild	Mantled guereza	Uganda	Colobus guereza	Colobus guereza_wild	Cercopithecidae	wild_Cercopithecidae
10936.BWC2026.mantledguereza	wild	Mantled guereza	Uganda	Colobus guereza	Colobus guereza_wild	Cercopithecidae	wild_Cercopithecidae
10936.BWC2061.mantledguereza	wild	Mantled guereza	Uganda	Colobus guereza	Colobus guereza_wild	Cercopithecidae	wild_Cercopithecidae
10936.BWC2063.mantledguereza	wild	Mantled guereza	Uganda	Colobus guereza	Colobus guereza_wild	Cercopithecidae	wild_Cercopithecidae
10936.BWC2115.mantledguereza	wild	Mantled guereza	Uganda	Colobus guereza	Colobus guereza_wild	Cercopithecidae	wild_Cercopithecidae
10936.BWC2339.mantledguereza	wild	Mantled guereza	Uganda	Colobus guereza	Colobus guereza_wild	Cercopithecidae	wild_Cercopithecidae
10936.BWC2341.mantledguereza	wild	Mantled guereza	Uganda	Colobus guereza	Colobus guereza_wild	Cercopithecidae	wild_Cercopithecidae
10936.BWC2342.mantledguereza	wild	Mantled guereza	Uganda	Colobus guereza	Colobus guereza_wild	Cercopithecidae	wild_Cercopithecidae
10936.FD.02290.wildebeest	captive	Black wildebeest	France	Connochaetes gnou	NA_captive	Bovidae	captive_Bovidae
10936.FD.0153.wildebeest	captive	Blue wildebeest	France	Connochaetes taurinus	Connochaetes taurinus_captive	Bovidae	captive_Bovidae
10936.FD.0156.wildebeest	captive	Blue wildebeest	France	Connochaetes taurinus	Connochaetes taurinus_captive	Bovidae	captive_Bovidae
10936.FD.0159.wildebeest	captive	Blue wildebeest	France	Connochaetes taurinus	Connochaetes taurinus_captive	Bovidae	captive_Bovidae
10936.FD.0162.wildebeest	captive	Blue wildebeest	France	Connochaetes taurinus	Connochaetes taurinus_captive	Bovidae	captive_Bovidae
10936.FD.0493.wildebeest	captive	Blue wildebeest	France	Connochaetes taurinus	Connochaetes taurinus_captive	Bovidae	captive_Bovidae
10936.TS.059.wildebeest	wild	Blue wildebeest	South Africa	Connochaetes taurinus	Connochaetes taurinus_wild	Bovidae	wild_Bovidae
10936.TS.088.wildebeest	wild	Blue wildebeest	South Africa	Connochaetes taurinus	Connochaetes taurinus_wild	Bovidae	wild_Bovidae
10936.ATL.24062.rhinoceros	captive	Eastern black rhinoceros	USA	Diceros bicornis	Diceros bicornis_captive	Rhinocerotidae	captive_Rhinocerotidae
10936.ATL.24081.rhinoceros	captive	Eastern black rhinoceros	USA	Diceros bicornis	Diceros bicornis_captive	Rhinocerotidae	captive_Rhinocerotidae
10936.BlackRhino1	captive	Black rhinoceros	USA	Diceros bicornis	Diceros bicornis_captive	Rhinocerotidae	captive_Rhinocerotidae
10936.BlackRhino2	captive	Black rhinoceros	USA	Diceros bicornis	Diceros bicornis_captive	Rhinocerotidae	captive_Rhinocerotidae
10936.ZU.18191.rhinoceros	captive	Eastern black rhinoceros	Switzerland	Diceros bicornis	Diceros bicornis_captive	Rhinocerotidae	captive_Rhinocerotidae
10936.ZU.18207.rhinoceros	captive	Eastern black rhinoceros	Switzerland	Diceros bicornis	Diceros bicornis_captive	Rhinocerotidae	captive_Rhinocerotidae
10936.TS.006.rhino	wild	Black rhino	South Africa	Diceros bicornis	Diceros bicornis_wild	Rhinocerotidae	wild_Rhinocerotidae
10936.FD.0045	captive	Somali wild ass	France	Equus asinus	NA_captive	Equidae	captive_Equidae
10936.FD.0256.ass	captive	African wild ass	France	Equus asinus	NA_captive	Equidae	captive_Equidae
10936.FD.0420.ass	captive	Somalian wild ass	France	Equus asinus	NA_captive	Equidae	captive_Equidae
10936.FD.0455.ass	captive	Somalian wild ass	France	Equus asinus	NA_captive	Equidae	captive_Equidae
10936.Wildass1	captive	Ass	USA	Equus asinus	NA_captive	Equidae	captive_Equidae
10936.ATL.25122.zebra	captive	Zebra	USA	Equus burchellii	Equus burchellii_captive	Equidae	captive_Equidae
10936.ATL.25126.zebra	captive	Zebra	USA	Equus burchellii	Equus burchellii_captive	Equidae	captive_Equidae
10936.ZU.18249.zebra	captive	Chapman Zebra	Switzerland	Equus burchellii	Equus burchellii_captive	Equidae	captive_Equidae
10936.TS.150.zebra	wild	Plain zebra	South Africa	Equus burchellii	Equus burchellii_wild	Equidae	wild_Equidae
10936.TS.151.zebra	wild	Plain zebra	South Africa	Equus burchellii	Equus burchellii_wild	Equidae	wild_Equidae
10936.FD.0222.zebra	captive	Grevys zebra	France	Equus grevyi	NA_captive	Equidae	captive_Equidae
10936.FD.02590.zebra	captive	Grevys zebra	France	Equus grevyi	NA_captive	Equidae	captive_Equidae
10936.ZebraSTL1	captive	Grevys zebra	USA	Equus grevyi	NA_captive	Equidae	captive_Equidae
10936.FD.0290.onager	captive	Onager	France	Equus hemionus	NA_captive	Equidae	captive_Equidae
10936.FD.0291.onager	captive	Onager	France	Equus hemionus	NA_captive	Equidae	captive_Equidae
10936.FD.0292.onager	captive	Onager	France	Equus hemionus	NA_captive	Equidae	captive_Equidae
10936.FD.02680.zebra	captive	Burchells zebra	France	Equus quagga	NA_captive	Equidae	captive_Equidae
10936.FD.0204.zebra	captive	Hartmanns mountain zebra	France	Equus zebra	Equus zebra_captive	Equidae	captive_Equidae
10936.FD.0207.zebra	captive	Hartmanns mountain zebra	France	Equus zebra	Equus zebra_captive	Equidae	captive_Equidae
10936.FD.02410.zebra	captive	Hartmanns mountain zebra	France	Equus zebra	Equus zebra_captive	Equidae	captive_Equidae
10936.TS.099.zebra	wild	Mountain zebra	South Africa	Equus zebra	Equus zebra_wild	Equidae	wild_Equidae
10936.TS.176.zebra	wild	Mountain zebra	South Africa	Equus zebra	Equus zebra_wild	Equidae	wild_Equidae
10936.Zebra2	wild	Hartmanns mountain zebra	Namibia	Equus zebra	Equus zebra_wild	Equidae	wild_Equidae
10936.ERUB.105M.redbelliedlemur	wild	Redbellied lemur	Madagascar	Eulemur rubriventer	NA_wild	Lemuridae	wild_Lemuridae
10936.ERUB.108M.redbelliedlemur	wild	Redbellied lemur	Madagascar	Eulemur rubriventer	NA_wild	Lemuridae	wild_Lemuridae
10936.ERUB.12M.redbelliedlemur	wild	Redbellied lemur	Madagascar	Eulemur rubriventer	NA_wild	Lemuridae	wild_Lemuridae
10936.ERUB.13M.redbelliedlemur	wild	Redbellied lemur	Madagascar	Eulemur rubriventer	NA_wild	Lemuridae	wild_Lemuridae
10936.ERUB.14M.redbelliedlemur	wild	Redbellied lemur	Madagascar	Eulemur rubriventer	NA_wild	Lemuridae	wild_Lemuridae
10936.ERUB.20M.redbelliedlemur	wild	Redbellied lemur	Madagascar	Eulemur rubriventer	NA_wild	Lemuridae	wild_Lemuridae
10936.ERUB.21M.redbelliedlemur	wild	Redbellied lemur	Madagascar	Eulemur rubriventer	NA_wild	Lemuridae	wild_Lemuridae
10936.ERUB.33M.redbelliedlemur	wild	Redbellied lemur	Madagascar	Eulemur rubriventer	NA_wild	Lemuridae	wild_Lemuridae
10936.ERUB.4M.redbelliedlemur	wild	Redbellied lemur	Madagascar	Eulemur rubriventer	NA_wild	Lemuridae	wild_Lemuridae
10936.ERUB.76M.redbelliedlemur	wild	Redbellied lemur	Madagascar	Eulemur rubriventer	NA_wild	Lemuridae	wild_Lemuridae
10936.ERUB.79M.redbelliedlemur	wild	Redbellied lemur	Madagascar	Eulemur rubriventer	NA_wild	Lemuridae	wild_Lemuridae
10936.ERUB.98M.redbelliedlemur	wild	Redbellied lemur	Madagascar	Eulemur rubriventer	NA_wild	Lemuridae	wild_Lemuridae
10936.ZU.18217.lemur	captive	Redfronted brown lemur	Switzerland	Eulemur rufus	NA_captive	Lemuridae	captive_Lemuridae
10936.ZU.18232.lemur	captive	Redfronted brown lemur	Switzerland	Eulemur rufus	NA_captive	Lemuridae	captive_Lemuridae
10936.ATL.24059.giraffe	captive	Giraffe	USA	Giraffa camelopardalis	Giraffa camelopardalis_captive	Giraffidae	captive_Giraffidae
10936.ATL.25121.giraffe	captive	Giraffe	USA	Giraffa camelopardalis	Giraffa camelopardalis_captive	Giraffidae	captive_Giraffidae
10936.ATL.25123.giraffe	captive	Giraffe	USA	Giraffa camelopardalis	Giraffa camelopardalis_captive	Giraffidae	captive_Giraffidae
10936.FD.0040.giraffe	captive	Reticulated giraffe	France	Giraffa camelopardalis	Giraffa camelopardalis_captive	Giraffidae	captive_Giraffidae
10936.TS.166.giraffe	wild	Giraffe	South Africa	Giraffa camelopardalis	Giraffa camelopardalis_wild	Giraffidae	wild_Giraffidae
10936.TS.182.giraffe	wild	Giraffe	South Africa	Giraffa camelopardalis	Giraffa camelopardalis_wild	Giraffidae	wild_Giraffidae
10936.ATL.25120.gorilla	captive	Western gorilla	USA	Gorilla gorilla	Gorilla gorilla_captive	Hominidae	captive_Hominidae
10936.FD.0444.gorilla	captive	Western lowland gorilla	France	Gorilla gorilla	Gorilla gorilla_captive	Hominidae	captive_Hominidae
10936.FD.0486.gorilla	captive	Western lowland gorilla	France	Gorilla gorilla	Gorilla gorilla_captive	Hominidae	captive_Hominidae
10936.FD.0502.gorilla	captive	Western lowland gorilla	France	Gorilla gorilla	Gorilla gorilla_captive	Hominidae	captive_Hominidae
10936.FD.18730.gorilla	captive	Western lowland gorilla	France	Gorilla gorilla	Gorilla gorilla_captive	Hominidae	captive_Hominidae
10936.FD.18951.gorilla	captive	Western lowland gorilla	France	Gorilla gorilla	Gorilla gorilla_captive	Hominidae	captive_Hominidae
10936.ZU.18199.gorilla	captive	Western gorilla	Switzerland	Gorilla gorilla	Gorilla gorilla_captive	Hominidae	captive_Hominidae
10936.ZU.18228.gorilla	captive	Western gorilla	Switzerland	Gorilla gorilla	Gorilla gorilla_captive	Hominidae	captive_Hominidae
10936.Gor1.westerngorilla	wild	Western gorilla	CAR	Gorilla gorilla	Gorilla gorilla_wild	Hominidae	wild_Hominidae
10936.Gor11.westerngorilla	wild	Western gorilla	CAR	Gorilla gorilla	Gorilla gorilla_wild	Hominidae	wild_Hominidae
10936.Gor12.westerngorilla	wild	Western gorilla	CAR	Gorilla gorilla	Gorilla gorilla_wild	Hominidae	wild_Hominidae
10936.Gor2.westerngorilla	wild	Western gorilla	CAR	Gorilla gorilla	Gorilla gorilla_wild	Hominidae	wild_Hominidae
10936.Gor3.westerngorilla	wild	Western gorilla	CAR	Gorilla gorilla	Gorilla gorilla_wild	Hominidae	wild_Hominidae
10936.Gor4.westerngorilla	wild	Western gorilla	CAR	Gorilla gorilla	Gorilla gorilla_wild	Hominidae	wild_Hominidae
10936.Gor5.westerngorilla	wild	Western gorilla	CAR	Gorilla gorilla	Gorilla gorilla_wild	Hominidae	wild_Hominidae
10936.Gor6.westerngorilla	wild	Western gorilla	CAR	Gorilla gorilla	Gorilla gorilla_wild	Hominidae	wild_Hominidae
10936.Gor7.westerngorilla	wild	Western gorilla	CAR	Gorilla gorilla	Gorilla gorilla_wild	Hominidae	wild_Hominidae
10936.Gor8.westerngorilla	wild	Western gorilla	CAR	Gorilla gorilla	Gorilla gorilla_wild	Hominidae	wild_Hominidae
10936.Gor9.westerngorilla	wild	Western gorilla	CAR	Gorilla gorilla	Gorilla gorilla_wild	Hominidae	wild_Hominidae
10936.FD.hippo.antelope	captive	Roan antelope	France	Hippotragus equinus	NA_captive	Bovidae	captive_Bovidae
10936.FD.0019.antelope	captive	Sable antelope	France	Hippotragus niger	Hippotragus niger_captive	Bovidae	captive_Bovidae
10936.FD.0020	captive	Sable antelope	France	Hippotragus niger	Hippotragus niger_captive	Bovidae	captive_Bovidae
10936.FD.0171.antelope	captive	Sable antelope	France	Hippotragus niger	Hippotragus niger_captive	Bovidae	captive_Bovidae
10936.FD.0174.antelope	captive	Sable antelope	France	Hippotragus niger	Hippotragus niger_captive	Bovidae	captive_Bovidae
10936.TS.159.antelope	wild	Sable antelope	South Africa	Hippotragus niger	Hippotragus niger_wild	Bovidae	wild_Bovidae
10936.TS.161.antelope	wild	Sable antelope	South Africa	Hippotragus niger	Hippotragus niger_wild	Bovidae	wild_Bovidae
850.Amz10baby	Human	Human	Venezuela	Homo sapiens	Homo sapiens_Human	Hominidae	Human_Hominidae
850.Amz11inf	Human	Human	Venezuela	Homo sapiens	Homo sapiens_Human	Hominidae	Human_Hominidae
850.Amz12inf	Human	Human	Venezuela	Homo sapiens	Homo sapiens_Human	Hominidae	Human_Hominidae
850.Amz13chld	Human	Human	Venezuela	Homo sapiens	Homo sapiens_Human	Hominidae	Human_Hominidae
850.Amz14chld	Human	Human	Venezuela	Homo sapiens	Homo sapiens_Human	Hominidae	Human_Hominidae
850.Amz15chld	Human	Human	Venezuela	Homo sapiens	Homo sapiens_Human	Hominidae	Human_Hominidae
850.Amz16chld	Human	Human	Venezuela	Homo sapiens	Homo sapiens_Human	Hominidae	Human_Hominidae
850.Amz17chld	Human	Human	Venezuela	Homo sapiens	Homo sapiens_Human	Hominidae	Human_Hominidae
850.Amz18chld	Human	Human	Venezuela	Homo sapiens	Homo sapiens_Human	Hominidae	Human_Hominidae
850.Amz19chld	Human	Human	Venezuela	Homo sapiens	Homo sapiens_Human	Hominidae	Human_Hominidae
850.Amz1baby	Human	Human	Venezuela	Homo sapiens	Homo sapiens_Human	Hominidae	Human_Hominidae
850.Amz1teenF	Human	Human	Venezuela	Homo sapiens	Homo sapiens_Human	Hominidae	Human_Hominidae
850.Amz20chld	Human	Human	Venezuela	Homo sapiens	Homo sapiens_Human	Hominidae	Human_Hominidae
850.Amz21chld	Human	Human	Venezuela	Homo sapiens	Homo sapiens_Human	Hominidae	Human_Hominidae
850.Amz22chld	Human	Human	Venezuela	Homo sapiens	Homo sapiens_Human	Hominidae	Human_Hominidae
850.Amz23chld	Human	Human	Venezuela	Homo sapiens	Homo sapiens_Human	Hominidae	Human_Hominidae
850.Amz24chld	Human	Human	Venezuela	Homo sapiens	Homo sapiens_Human	Hominidae	Human_Hominidae
850.Amz25chld	Human	Human	Venezuela	Homo sapiens	Homo sapiens_Human	Hominidae	Human_Hominidae
850.Amz26chld	Human	Human	Venezuela	Homo sapiens	Homo sapiens_Human	Hominidae	Human_Hominidae
850.Amz27chld	Human	Human	Venezuela	Homo sapiens	Homo sapiens_Human	Hominidae	Human_Hominidae
850.Amz28chld	Human	Human	Venezuela	Homo sapiens	Homo sapiens_Human	Hominidae	Human_Hominidae
850.Amz29adlt	Human	Human	Venezuela	Homo sapiens	Homo sapiens_Human	Hominidae	Human_Hominidae
850.Amz2adltF	Human	Human	Venezuela	Homo sapiens	Homo sapiens_Human	Hominidae	Human_Hominidae
850.Amz2infF	Human	Human	Venezuela	Homo sapiens	Homo sapiens_Human	Hominidae	Human_Hominidae
850.Amz30adlt	Human	Human	Venezuela	Homo sapiens	Homo sapiens_Human	Hominidae	Human_Hominidae
850.Amz31adlt	Human	Human	Venezuela	Homo sapiens	Homo sapiens_Human	Hominidae	Human_Hominidae
850.Amz32eldF	Human	Human	Venezuela	Homo sapiens	Homo sapiens_Human	Hominidae	Human_Hominidae
850.Amz33eld	Human	Human	Venezuela	Homo sapiens	Homo sapiens_Human	Hominidae	Human_Hominidae
850.Amz34eld	Human	Human	Venezuela	Homo sapiens	Homo sapiens_Human	Hominidae	Human_Hominidae
850.Amz3chldF3	Human	Human	Venezuela	Homo sapiens	Homo sapiens_Human	Hominidae	Human_Hominidae
850.Amz3chldM1	Human	Human	Venezuela	Homo sapiens	Homo sapiens_Human	Hominidae	Human_Hominidae
850.Amz3chldM2	Human	Human	Venezuela	Homo sapiens	Homo sapiens_Human	Hominidae	Human_Hominidae
850.Amz4adltF	Human	Human	Venezuela	Homo sapiens	Homo sapiens_Human	Hominidae	Human_Hominidae
850.Amz4chldM1	Human	Human	Venezuela	Homo sapiens	Homo sapiens_Human	Hominidae	Human_Hominidae
850.Amz4chldM2	Human	Human	Venezuela	Homo sapiens	Homo sapiens_Human	Hominidae	Human_Hominidae
850.Amz5chldF1	Human	Human	Venezuela	Homo sapiens	Homo sapiens_Human	Hominidae	Human_Hominidae
850.Amz5chldF2	Human	Human	Venezuela	Homo sapiens	Homo sapiens_Human	Hominidae	Human_Hominidae
850.Amz5chldM	Human	Human	Venezuela	Homo sapiens	Homo sapiens_Human	Hominidae	Human_Hominidae
850.Amz5eldF	Human	Human	Venezuela	Homo sapiens	Homo sapiens_Human	Hominidae	Human_Hominidae
850.Amz5teenF	Human	Human	Venezuela	Homo sapiens	Homo sapiens_Human	Hominidae	Human_Hominidae
850.Amz6chldM	Human	Human	Venezuela	Homo sapiens	Homo sapiens_Human	Hominidae	Human_Hominidae
850.Amz6eldF	Human	Human	Venezuela	Homo sapiens	Homo sapiens_Human	Hominidae	Human_Hominidae
850.Amz6eldM	Human	Human	Venezuela	Homo sapiens	Homo sapiens_Human	Hominidae	Human_Hominidae
850.Amz6teen	Human	Human	Venezuela	Homo sapiens	Homo sapiens_Human	Hominidae	Human_Hominidae
850.Amz7adltF	Human	Human	Venezuela	Homo sapiens	Homo sapiens_Human	Hominidae	Human_Hominidae
850.Amz7eldM	Human	Human	Venezuela	Homo sapiens	Homo sapiens_Human	Hominidae	Human_Hominidae
850.Amz9baby	Human	Human	USA	Homo sapiens	Homo sapiens_Human	Hominidae	Human_Hominidae
850.AmzC10adltF1	Human	Human	Venezuela	Homo sapiens	Homo sapiens_Human	Hominidae	Human_Hominidae
850.AmzC10adltF2	Human	Human	Venezuela	Homo sapiens	Homo sapiens_Human	Hominidae	Human_Hominidae
850.AmzC11adltF1	Human	Human	Venezuela	Homo sapiens	Homo sapiens_Human	Hominidae	Human_Hominidae
850.AmzC11adltF2	Human	Human	Venezuela	Homo sapiens	Homo sapiens_Human	Hominidae	Human_Hominidae
850.AmzC11adltF3	Human	Human	Venezuela	Homo sapiens	Homo sapiens_Human	Hominidae	Human_Hominidae
850.AmzC12adltF	Human	Human	Venezuela	Homo sapiens	Homo sapiens_Human	Hominidae	Human_Hominidae
850.AmzC12chldM	Human	Human	Venezuela	Homo sapiens	Homo sapiens_Human	Hominidae	Human_Hominidae
850.AmzC13babyF	Human	Human	Venezuela	Homo sapiens	Homo sapiens_Human	Hominidae	Human_Hominidae
850.AmzC14infF	Human	Human	Venezuela	Homo sapiens	Homo sapiens_Human	Hominidae	Human_Hominidae
850.AmzC15infF	Human	Human	Venezuela	Homo sapiens	Homo sapiens_Human	Hominidae	Human_Hominidae
850.AmzC16chldM	Human	Human	Venezuela	Homo sapiens	Homo sapiens_Human	Hominidae	Human_Hominidae
850.AmzC17chldM	Human	Human	Venezuela	Homo sapiens	Homo sapiens_Human	Hominidae	Human_Hominidae
850.AmzC18chldM	Human	Human	Venezuela	Homo sapiens	Homo sapiens_Human	Hominidae	Human_Hominidae
850.AmzC19chldM	Human	Human	Venezuela	Homo sapiens	Homo sapiens_Human	Hominidae	Human_Hominidae
850.AmzC1babyF1	Human	Human	Venezuela	Homo sapiens	Homo sapiens_Human	Hominidae	Human_Hominidae
850.AmzC1babyF2	Human	Human	Venezuela	Homo sapiens	Homo sapiens_Human	Hominidae	Human_Hominidae
850.AmzC20chldM	Human	Human	Venezuela	Homo sapiens	Homo sapiens_Human	Hominidae	Human_Hominidae
850.AmzC21chldM	Human	Human	Venezuela	Homo sapiens	Homo sapiens_Human	Hominidae	Human_Hominidae
850.AmzC22chldM	Human	Human	Venezuela	Homo sapiens	Homo sapiens_Human	Hominidae	Human_Hominidae
850.AmzC23chldM	Human	Human	Venezuela	Homo sapiens	Homo sapiens_Human	Hominidae	Human_Hominidae
850.AmzC24chldM	Human	Human	Venezuela	Homo sapiens	Homo sapiens_Human	Hominidae	Human_Hominidae
850.AmzC25teenF	Human	Human	Venezuela	Homo sapiens	Homo sapiens_Human	Hominidae	Human_Hominidae
850.AmzC26chldF	Human	Human	Venezuela	Homo sapiens	Homo sapiens_Human	Hominidae	Human_Hominidae
850.AmzC27teenF	Human	Human	Venezuela	Homo sapiens	Homo sapiens_Human	Hominidae	Human_Hominidae
850.AmzC28chldM	Human	Human	Venezuela	Homo sapiens	Homo sapiens_Human	Hominidae	Human_Hominidae
850.AmzC29adltF	Human	Human	Venezuela	Homo sapiens	Homo sapiens_Human	Hominidae	Human_Hominidae
850.AmzC2adltF	Human	Human	Venezuela	Homo sapiens	Homo sapiens_Human	Hominidae	Human_Hominidae
850.AmzC2babyF	Human	Human	Venezuela	Homo sapiens	Homo sapiens_Human	Hominidae	Human_Hominidae
850.AmzC2chldM1	Human	Human	Venezuela	Homo sapiens	Homo sapiens_Human	Hominidae	Human_Hominidae
850.AmzC2chldM2	Human	Human	Venezuela	Homo sapiens	Homo sapiens_Human	Hominidae	Human_Hominidae
850.AmzC30adltF	Human	Human	Venezuela	Homo sapiens	Homo sapiens_Human	Hominidae	Human_Hominidae
850.AmzC31adltF	Human	Human	Venezuela	Homo sapiens	Homo sapiens_Human	Hominidae	Human_Hominidae
850.AmzC32adltF	Human	Human	Venezuela	Homo sapiens	Homo sapiens_Human	Hominidae	Human_Hominidae
850.AmzC33adltF	Human	Human	Venezuela	Homo sapiens	Homo sapiens_Human	Hominidae	Human_Hominidae
850.AmzC3adltF	Human	Human	Venezuela	Homo sapiens	Homo sapiens_Human	Hominidae	Human_Hominidae
850.AmzC3adltM	Human	Human	Venezuela	Homo sapiens	Homo sapiens_Human	Hominidae	Human_Hominidae
850.AmzC3babyF	Human	Human	Venezuela	Homo sapiens	Homo sapiens_Human	Hominidae	Human_Hominidae
850.AmzC3chldM	Human	Human	Venezuela	Homo sapiens	Homo sapiens_Human	Hominidae	Human_Hominidae
850.AmzC4adltF	Human	Human	Venezuela	Homo sapiens	Homo sapiens_Human	Hominidae	Human_Hominidae
850.AmzC4chldF	Human	Human	Venezuela	Homo sapiens	Homo sapiens_Human	Hominidae	Human_Hominidae
850.AmzC4chldM	Human	Human	Venezuela	Homo sapiens	Homo sapiens_Human	Hominidae	Human_Hominidae
850.AmzC5adltF	Human	Human	Venezuela	Homo sapiens	Homo sapiens_Human	Hominidae	Human_Hominidae
850.AmzC5chldF	Human	Human	Venezuela	Homo sapiens	Homo sapiens_Human	Hominidae	Human_Hominidae
850.AmzC5chldM	Human	Human	Venezuela	Homo sapiens	Homo sapiens_Human	Hominidae	Human_Hominidae
850.AmzC6adltF	Human	Human	Venezuela	Homo sapiens	Homo sapiens_Human	Hominidae	Human_Hominidae
850.AmzC6chldM1	Human	Human	Venezuela	Homo sapiens	Homo sapiens_Human	Hominidae	Human_Hominidae
850.AmzC6chldM2	Human	Human	Venezuela	Homo sapiens	Homo sapiens_Human	Hominidae	Human_Hominidae
850.AmzC7adltF	Human	Human	Venezuela	Homo sapiens	Homo sapiens_Human	Hominidae	Human_Hominidae
850.AmzC7chldM	Human	Human	Venezuela	Homo sapiens	Homo sapiens_Human	Hominidae	Human_Hominidae
850.AmzC8adltM	Human	Human	Venezuela	Homo sapiens	Homo sapiens_Human	Hominidae	Human_Hominidae
850.AmzC8chldF	Human	Human	Venezuela	Homo sapiens	Homo sapiens_Human	Hominidae	Human_Hominidae
850.AmzC9adltF	Human	Human	Venezuela	Homo sapiens	Homo sapiens_Human	Hominidae	Human_Hominidae
850.AmzC9adltM	Human	Human	Venezuela	Homo sapiens	Homo sapiens_Human	Hominidae	Human_Hominidae
850.F3T1pre4	Human	Human	USA	Homo sapiens	Homo sapiens_Human	Hominidae	Human_Hominidae
850.F3T2pre4	Human	Human	USA	Homo sapiens	Homo sapiens_Human	Hominidae	Human_Hominidae
850.F4T1pre4	Human	Human	USA	Homo sapiens	Homo sapiens_Human	Hominidae	Human_Hominidae
850.F4T2pre4	Human	Human	USA	Homo sapiens	Homo sapiens_Human	Hominidae	Human_Hominidae
850.TS1	Human	Human	USA	Homo sapiens	Homo sapiens_Human	Hominidae	Human_Hominidae
850.TS109	Human	Human	USA	Homo sapiens	Homo sapiens_Human	Hominidae	Human_Hominidae
850.TS110	Human	Human	USA	Homo sapiens	Homo sapiens_Human	Hominidae	Human_Hominidae
850.TS111	Human	Human	USA	Homo sapiens	Homo sapiens_Human	Hominidae	Human_Hominidae
850.TS127	Human	Human	USA	Homo sapiens	Homo sapiens_Human	Hominidae	Human_Hominidae
850.TS128	Human	Human	USA	Homo sapiens	Homo sapiens_Human	Hominidae	Human_Hominidae
850.TS129	Human	Human	USA	Homo sapiens	Homo sapiens_Human	Hominidae	Human_Hominidae
850.TS13	Human	Human	USA	Homo sapiens	Homo sapiens_Human	Hominidae	Human_Hominidae
850.TS14	Human	Human	USA	Homo sapiens	Homo sapiens_Human	Hominidae	Human_Hominidae
850.TS15	Human	Human	USA	Homo sapiens	Homo sapiens_Human	Hominidae	Human_Hominidae
850.TS163	Human	Human	USA	Homo sapiens	Homo sapiens_Human	Hominidae	Human_Hominidae
850.TS164	Human	Human	USA	Homo sapiens	Homo sapiens_Human	Hominidae	Human_Hominidae
850.TS165	Human	Human	USA	Homo sapiens	Homo sapiens_Human	Hominidae	Human_Hominidae
850.TS184	Human	Human	USA	Homo sapiens	Homo sapiens_Human	Hominidae	Human_Hominidae
850.TS185	Human	Human	USA	Homo sapiens	Homo sapiens_Human	Hominidae	Human_Hominidae
850.TS186	Human	Human	USA	Homo sapiens	Homo sapiens_Human	Hominidae	Human_Hominidae
850.TS193	Human	Human	USA	Homo sapiens	Homo sapiens_Human	Hominidae	Human_Hominidae
850.TS194	Human	Human	USA	Homo sapiens	Homo sapiens_Human	Hominidae	Human_Hominidae
850.TS195	Human	Human	USA	Homo sapiens	Homo sapiens_Human	Hominidae	Human_Hominidae
850.TS2	Human	Human	USA	Homo sapiens	Homo sapiens_Human	Hominidae	Human_Hominidae
850.TS25	Human	Human	USA	Homo sapiens	Homo sapiens_Human	Hominidae	Human_Hominidae
850.TS26	Human	Human	USA	Homo sapiens	Homo sapiens_Human	Hominidae	Human_Hominidae
850.TS27	Human	Human	USA	Homo sapiens	Homo sapiens_Human	Hominidae	Human_Hominidae
850.TS3	Human	Human	USA	Homo sapiens	Homo sapiens_Human	Hominidae	Human_Hominidae
850.TS4	Human	Human	USA	Homo sapiens	Homo sapiens_Human	Hominidae	Human_Hominidae
850.TS5	Human	Human	USA	Homo sapiens	Homo sapiens_Human	Hominidae	Human_Hominidae
850.TS6	Human	Human	USA	Homo sapiens	Homo sapiens_Human	Hominidae	Human_Hominidae
850.TS7	Human	Human	USA	Homo sapiens	Homo sapiens_Human	Hominidae	Human_Hominidae
850.TS8	Human	Human	USA	Homo sapiens	Homo sapiens_Human	Hominidae	Human_Hominidae
850.TS9	Human	Human	USA	Homo sapiens	Homo sapiens_Human	Hominidae	Human_Hominidae
850.USBld1	Human	Human	USA	Homo sapiens	Homo sapiens_Human	Hominidae	Human_Hominidae
850.USBldAdlt6	Human	Human	USA	Homo sapiens	Homo sapiens_Human	Hominidae	Human_Hominidae
850.USBldChld10	Human	Human	USA	Homo sapiens	Homo sapiens_Human	Hominidae	Human_Hominidae
850.USBldChld2	Human	Human	USA	Homo sapiens	Homo sapiens_Human	Hominidae	Human_Hominidae
850.USBldChld4	Human	Human	USA	Homo sapiens	Homo sapiens_Human	Hominidae	Human_Hominidae
850.USBldChld5	Human	Human	USA	Homo sapiens	Homo sapiens_Human	Hominidae	Human_Hominidae
850.USBldChld7	Human	Human	USA	Homo sapiens	Homo sapiens_Human	Hominidae	Human_Hominidae
850.USBldChld8	Human	Human	USA	Homo sapiens	Homo sapiens_Human	Hominidae	Human_Hominidae
850.USBldInf3	Human	Human	USA	Homo sapiens	Homo sapiens_Human	Hominidae	Human_Hominidae
850.USchp11Child	Human	Human	USA	Homo sapiens	Homo sapiens_Human	Hominidae	Human_Hominidae
850.USchp18Child	Human	Human	USA	Homo sapiens	Homo sapiens_Human	Hominidae	Human_Hominidae
850.USchp18Mom	Human	Human	USA	Homo sapiens	Homo sapiens_Human	Hominidae	Human_Hominidae
850.USchp1Child	Human	Human	USA	Homo sapiens	Homo sapiens_Human	Hominidae	Human_Hominidae
850.USchp1Mom	Human	Human	USA	Homo sapiens	Homo sapiens_Human	Hominidae	Human_Hominidae
850.USchp25Child	Human	Human	USA	Homo sapiens	Homo sapiens_Human	Hominidae	Human_Hominidae
850.USchp25Mom	Human	Human	USA	Homo sapiens	Homo sapiens_Human	Hominidae	Human_Hominidae
850.USchp33ChildA	Human	Human	USA	Homo sapiens	Homo sapiens_Human	Hominidae	Human_Hominidae
850.USchp33ChildB	Human	Human	USA	Homo sapiens	Homo sapiens_Human	Hominidae	Human_Hominidae
850.USchp33Mom	Human	Human	USA	Homo sapiens	Homo sapiens_Human	Hominidae	Human_Hominidae
850.USchp35Child	Human	Human	USA	Homo sapiens	Homo sapiens_Human	Hominidae	Human_Hominidae
850.USchp35Mom	Human	Human	USA	Homo sapiens	Homo sapiens_Human	Hominidae	Human_Hominidae
850.USchp36Infant	Human	Human	USA	Homo sapiens	Homo sapiens_Human	Hominidae	Human_Hominidae
850.USchp36Mom	Human	Human	USA	Homo sapiens	Homo sapiens_Human	Hominidae	Human_Hominidae
850.USchp3Child	Human	Human	USA	Homo sapiens	Homo sapiens_Human	Hominidae	Human_Hominidae
850.USchp3Mom	Human	Human	USA	Homo sapiens	Homo sapiens_Human	Hominidae	Human_Hominidae
850.USchp41Infant	Human	Human	USA	Homo sapiens	Homo sapiens_Human	Hominidae	Human_Hominidae
850.USchp41Mom	Human	Human	USA	Homo sapiens	Homo sapiens_Human	Hominidae	Human_Hominidae
850.USchp4Infant	Human	Human	USA	Homo sapiens	Homo sapiens_Human	Hominidae	Human_Hominidae
850.USchp4Mom	Human	Human	USA	Homo sapiens	Homo sapiens_Human	Hominidae	Human_Hominidae
850.USchp50Infant	Human	Human	USA	Homo sapiens	Homo sapiens_Human	Hominidae	Human_Hominidae
850.USchp60Child	Human	Human	USA	Homo sapiens	Homo sapiens_Human	Hominidae	Human_Hominidae
850.USchp60Mom	Human	Human	USA	Homo sapiens	Homo sapiens_Human	Hominidae	Human_Hominidae
850.USinfTw1.1	Human	Human	USA	Homo sapiens	Homo sapiens_Human	Hominidae	Human_Hominidae
850.USinfTw1.2	Human	Human	USA	Homo sapiens	Homo sapiens_Human	Hominidae	Human_Hominidae
850.USinfTw10.1	Human	Human	USA	Homo sapiens	Homo sapiens_Human	Hominidae	Human_Hominidae
850.USinfTw10.2	Human	Human	USA	Homo sapiens	Homo sapiens_Human	Hominidae	Human_Hominidae
850.USinfTw11.1	Human	Human	USA	Homo sapiens	Homo sapiens_Human	Hominidae	Human_Hominidae
850.USinfTw11.2	Human	Human	USA	Homo sapiens	Homo sapiens_Human	Hominidae	Human_Hominidae
850.USinfTw12.1	Human	Human	USA	Homo sapiens	Homo sapiens_Human	Hominidae	Human_Hominidae
850.USinfTw12.2	Human	Human	USA	Homo sapiens	Homo sapiens_Human	Hominidae	Human_Hominidae
850.USinfTw13.1	Human	Human	USA	Homo sapiens	Homo sapiens_Human	Hominidae	Human_Hominidae
850.USinfTw13.2	Human	Human	USA	Homo sapiens	Homo sapiens_Human	Hominidae	Human_Hominidae
850.USinfTw15.1	Human	Human	USA	Homo sapiens	Homo sapiens_Human	Hominidae	Human_Hominidae
850.USinfTw15.2	Human	Human	USA	Homo sapiens	Homo sapiens_Human	Hominidae	Human_Hominidae
850.USinfTw16.1	Human	Human	USA	Homo sapiens	Homo sapiens_Human	Hominidae	Human_Hominidae
850.USinfTw16.2	Human	Human	USA	Homo sapiens	Homo sapiens_Human	Hominidae	Human_Hominidae
850.USinfTw17.1	Human	Human	USA	Homo sapiens	Homo sapiens_Human	Hominidae	Human_Hominidae
850.USinfTw18.1	Human	Human	USA	Homo sapiens	Homo sapiens_Human	Hominidae	Human_Hominidae
850.USinfTw18.2	Human	Human	USA	Homo sapiens	Homo sapiens_Human	Hominidae	Human_Hominidae
850.USinfTw19.1	Human	Human	USA	Homo sapiens	Homo sapiens_Human	Hominidae	Human_Hominidae
850.USinfTw19.2	Human	Human	USA	Homo sapiens	Homo sapiens_Human	Hominidae	Human_Hominidae
850.USinfTw2.1	Human	Human	USA	Homo sapiens	Homo sapiens_Human	Hominidae	Human_Hominidae
850.USinfTw2.2	Human	Human	USA	Homo sapiens	Homo sapiens_Human	Hominidae	Human_Hominidae
850.USinfTw20.1	Human	Human	USA	Homo sapiens	Homo sapiens_Human	Hominidae	Human_Hominidae
850.USinfTw20.2	Human	Human	USA	Homo sapiens	Homo sapiens_Human	Hominidae	Human_Hominidae
850.USinfTw21.1	Human	Human	USA	Homo sapiens	Homo sapiens_Human	Hominidae	Human_Hominidae
850.USinfTw21.2	Human	Human	USA	Homo sapiens	Homo sapiens_Human	Hominidae	Human_Hominidae
850.USinfTw3.1	Human	Human	USA	Homo sapiens	Homo sapiens_Human	Hominidae	Human_Hominidae
850.USinfTw3.2	Human	Human	USA	Homo sapiens	Homo sapiens_Human	Hominidae	Human_Hominidae
850.USinfTw4.1	Human	Human	USA	Homo sapiens	Homo sapiens_Human	Hominidae	Human_Hominidae
850.USinfTw4.2	Human	Human	USA	Homo sapiens	Homo sapiens_Human	Hominidae	Human_Hominidae
850.USinfTw5.1	Human	Human	USA	Homo sapiens	Homo sapiens_Human	Hominidae	Human_Hominidae
850.USinfTw5.2	Human	Human	USA	Homo sapiens	Homo sapiens_Human	Hominidae	Human_Hominidae
850.USinfTw6.1	Human	Human	USA	Homo sapiens	Homo sapiens_Human	Hominidae	Human_Hominidae
850.USinfTw6.2	Human	Human	USA	Homo sapiens	Homo sapiens_Human	Hominidae	Human_Hominidae
850.USinfTw7.1	Human	Human	USA	Homo sapiens	Homo sapiens_Human	Hominidae	Human_Hominidae
850.USinfTw7.2	Human	Human	USA	Homo sapiens	Homo sapiens_Human	Hominidae	Human_Hominidae
850.USinfTw8.1	Human	Human	USA	Homo sapiens	Homo sapiens_Human	Hominidae	Human_Hominidae
850.USinfTw8.2	Human	Human	USA	Homo sapiens	Homo sapiens_Human	Hominidae	Human_Hominidae
850.USinfTw9.1	Human	Human	USA	Homo sapiens	Homo sapiens_Human	Hominidae	Human_Hominidae
850.USinfTw9.2	Human	Human	USA	Homo sapiens	Homo sapiens_Human	Hominidae	Human_Hominidae
850.USygt1.F	Human	Human	USA	Homo sapiens	Homo sapiens_Human	Hominidae	Human_Hominidae
850.USygt1.M	Human	Human	USA	Homo sapiens	Homo sapiens_Human	Hominidae	Human_Hominidae
850.USygt1.T1	Human	Human	USA	Homo sapiens	Homo sapiens_Human	Hominidae	Human_Hominidae
850.USygt1.T2	Human	Human	USA	Homo sapiens	Homo sapiens_Human	Hominidae	Human_Hominidae
850.USygt10.M	Human	Human	USA	Homo sapiens	Homo sapiens_Human	Hominidae	Human_Hominidae
850.USygt10.T1	Human	Human	USA	Homo sapiens	Homo sapiens_Human	Hominidae	Human_Hominidae
850.USygt10.T2	Human	Human	USA	Homo sapiens	Homo sapiens_Human	Hominidae	Human_Hominidae
850.USygt11.F	Human	Human	USA	Homo sapiens	Homo sapiens_Human	Hominidae	Human_Hominidae
850.USygt11.M	Human	Human	USA	Homo sapiens	Homo sapiens_Human	Hominidae	Human_Hominidae
850.USygt11.T1	Human	Human	USA	Homo sapiens	Homo sapiens_Human	Hominidae	Human_Hominidae
850.USygt11.T2	Human	Human	USA	Homo sapiens	Homo sapiens_Human	Hominidae	Human_Hominidae
850.USygt12.F	Human	Human	USA	Homo sapiens	Homo sapiens_Human	Hominidae	Human_Hominidae
850.USygt12.M	Human	Human	USA	Homo sapiens	Homo sapiens_Human	Hominidae	Human_Hominidae
850.USygt12.T1	Human	Human	USA	Homo sapiens	Homo sapiens_Human	Hominidae	Human_Hominidae
850.USygt12.T2	Human	Human	USA	Homo sapiens	Homo sapiens_Human	Hominidae	Human_Hominidae
850.USygt13.F	Human	Human	USA	Homo sapiens	Homo sapiens_Human	Hominidae	Human_Hominidae
850.USygt13.M	Human	Human	USA	Homo sapiens	Homo sapiens_Human	Hominidae	Human_Hominidae
850.USygt13.T1	Human	Human	USA	Homo sapiens	Homo sapiens_Human	Hominidae	Human_Hominidae
850.USygt13.T2	Human	Human	USA	Homo sapiens	Homo sapiens_Human	Hominidae	Human_Hominidae
850.USygt14.F	Human	Human	USA	Homo sapiens	Homo sapiens_Human	Hominidae	Human_Hominidae
850.USygt14.M	Human	Human	USA	Homo sapiens	Homo sapiens_Human	Hominidae	Human_Hominidae
850.USygt14.T1	Human	Human	USA	Homo sapiens	Homo sapiens_Human	Hominidae	Human_Hominidae
850.USygt14.T2	Human	Human	USA	Homo sapiens	Homo sapiens_Human	Hominidae	Human_Hominidae
850.USygt15.F	Human	Human	USA	Homo sapiens	Homo sapiens_Human	Hominidae	Human_Hominidae
850.USygt15.M	Human	Human	USA	Homo sapiens	Homo sapiens_Human	Hominidae	Human_Hominidae
850.USygt15.T1	Human	Human	USA	Homo sapiens	Homo sapiens_Human	Hominidae	Human_Hominidae
850.USygt15.T2	Human	Human	USA	Homo sapiens	Homo sapiens_Human	Hominidae	Human_Hominidae
850.USygt16.B1	Human	Human	USA	Homo sapiens	Homo sapiens_Human	Hominidae	Human_Hominidae
850.USygt16.F	Human	Human	USA	Homo sapiens	Homo sapiens_Human	Hominidae	Human_Hominidae
850.USygt16.M	Human	Human	USA	Homo sapiens	Homo sapiens_Human	Hominidae	Human_Hominidae
850.USygt16.T1	Human	Human	USA	Homo sapiens	Homo sapiens_Human	Hominidae	Human_Hominidae
850.USygt16.T2	Human	Human	USA	Homo sapiens	Homo sapiens_Human	Hominidae	Human_Hominidae
850.USygt17.M	Human	Human	USA	Homo sapiens	Homo sapiens_Human	Hominidae	Human_Hominidae
850.USygt17.T1	Human	Human	USA	Homo sapiens	Homo sapiens_Human	Hominidae	Human_Hominidae
850.USygt17.T2	Human	Human	USA	Homo sapiens	Homo sapiens_Human	Hominidae	Human_Hominidae
850.USygt18.M	Human	Human	USA	Homo sapiens	Homo sapiens_Human	Hominidae	Human_Hominidae
850.USygt18.T1	Human	Human	USA	Homo sapiens	Homo sapiens_Human	Hominidae	Human_Hominidae
850.USygt18.T2	Human	Human	USA	Homo sapiens	Homo sapiens_Human	Hominidae	Human_Hominidae
850.USygt19.B1	Human	Human	USA	Homo sapiens	Homo sapiens_Human	Hominidae	Human_Hominidae
850.USygt19.M	Human	Human	USA	Homo sapiens	Homo sapiens_Human	Hominidae	Human_Hominidae
850.USygt19.T1	Human	Human	USA	Homo sapiens	Homo sapiens_Human	Hominidae	Human_Hominidae
850.USygt19.T2	Human	Human	USA	Homo sapiens	Homo sapiens_Human	Hominidae	Human_Hominidae
850.USygt2.M	Human	Human	USA	Homo sapiens	Homo sapiens_Human	Hominidae	Human_Hominidae
850.USygt20.F	Human	Human	USA	Homo sapiens	Homo sapiens_Human	Hominidae	Human_Hominidae
850.USygt20.M	Human	Human	USA	Homo sapiens	Homo sapiens_Human	Hominidae	Human_Hominidae
850.USygt20.T1	Human	Human	USA	Homo sapiens	Homo sapiens_Human	Hominidae	Human_Hominidae
850.USygt20.T2	Human	Human	USA	Homo sapiens	Homo sapiens_Human	Hominidae	Human_Hominidae
850.USygt21.B1	Human	Human	USA	Homo sapiens	Homo sapiens_Human	Hominidae	Human_Hominidae
850.USygt21.F	Human	Human	USA	Homo sapiens	Homo sapiens_Human	Hominidae	Human_Hominidae
850.USygt21.M	Human	Human	USA	Homo sapiens	Homo sapiens_Human	Hominidae	Human_Hominidae
850.USygt21.T1	Human	Human	USA	Homo sapiens	Homo sapiens_Human	Hominidae	Human_Hominidae
850.USygt21.T2	Human	Human	USA	Homo sapiens	Homo sapiens_Human	Hominidae	Human_Hominidae
850.USygt22.F	Human	Human	USA	Homo sapiens	Homo sapiens_Human	Hominidae	Human_Hominidae
850.USygt22.M	Human	Human	USA	Homo sapiens	Homo sapiens_Human	Hominidae	Human_Hominidae
850.USygt22.T1	Human	Human	USA	Homo sapiens	Homo sapiens_Human	Hominidae	Human_Hominidae
850.USygt22.T2	Human	Human	USA	Homo sapiens	Homo sapiens_Human	Hominidae	Human_Hominidae
850.USygt23.F	Human	Human	USA	Homo sapiens	Homo sapiens_Human	Hominidae	Human_Hominidae
850.USygt23.M	Human	Human	USA	Homo sapiens	Homo sapiens_Human	Hominidae	Human_Hominidae
850.USygt23.T1	Human	Human	USA	Homo sapiens	Homo sapiens_Human	Hominidae	Human_Hominidae
850.USygt23.T2	Human	Human	USA	Homo sapiens	Homo sapiens_Human	Hominidae	Human_Hominidae
850.USygt24.M	Human	Human	USA	Homo sapiens	Homo sapiens_Human	Hominidae	Human_Hominidae
850.USygt24.T1	Human	Human	USA	Homo sapiens	Homo sapiens_Human	Hominidae	Human_Hominidae
850.USygt24.T2	Human	Human	USA	Homo sapiens	Homo sapiens_Human	Hominidae	Human_Hominidae
850.USygt25.B1	Human	Human	USA	Homo sapiens	Homo sapiens_Human	Hominidae	Human_Hominidae
850.USygt25.B2	Human	Human	USA	Homo sapiens	Homo sapiens_Human	Hominidae	Human_Hominidae
850.USygt25.F	Human	Human	USA	Homo sapiens	Homo sapiens_Human	Hominidae	Human_Hominidae
850.USygt25.M	Human	Human	USA	Homo sapiens	Homo sapiens_Human	Hominidae	Human_Hominidae
850.USygt25.S1	Human	Human	USA	Homo sapiens	Homo sapiens_Human	Hominidae	Human_Hominidae
850.USygt25.T1	Human	Human	USA	Homo sapiens	Homo sapiens_Human	Hominidae	Human_Hominidae
850.USygt25.T2	Human	Human	USA	Homo sapiens	Homo sapiens_Human	Hominidae	Human_Hominidae
850.USygt26.M	Human	Human	USA	Homo sapiens	Homo sapiens_Human	Hominidae	Human_Hominidae
850.USygt26.T1	Human	Human	USA	Homo sapiens	Homo sapiens_Human	Hominidae	Human_Hominidae
850.USygt26.T2	Human	Human	USA	Homo sapiens	Homo sapiens_Human	Hominidae	Human_Hominidae
850.USygt27.F	Human	Human	USA	Homo sapiens	Homo sapiens_Human	Hominidae	Human_Hominidae
850.USygt27.M	Human	Human	USA	Homo sapiens	Homo sapiens_Human	Hominidae	Human_Hominidae
850.USygt27.T1	Human	Human	USA	Homo sapiens	Homo sapiens_Human	Hominidae	Human_Hominidae
850.USygt27.T2	Human	Human	USA	Homo sapiens	Homo sapiens_Human	Hominidae	Human_Hominidae
850.USygt28.M	Human	Human	USA	Homo sapiens	Homo sapiens_Human	Hominidae	Human_Hominidae
850.USygt28.T1	Human	Human	USA	Homo sapiens	Homo sapiens_Human	Hominidae	Human_Hominidae
850.USygt28.T2	Human	Human	USA	Homo sapiens	Homo sapiens_Human	Hominidae	Human_Hominidae
850.USygt29.M	Human	Human	USA	Homo sapiens	Homo sapiens_Human	Hominidae	Human_Hominidae
850.USygt29.T1	Human	Human	USA	Homo sapiens	Homo sapiens_Human	Hominidae	Human_Hominidae
850.USygt29.T2	Human	Human	USA	Homo sapiens	Homo sapiens_Human	Hominidae	Human_Hominidae
850.USygt3.M	Human	Human	USA	Homo sapiens	Homo sapiens_Human	Hominidae	Human_Hominidae
850.USygt3.T1	Human	Human	USA	Homo sapiens	Homo sapiens_Human	Hominidae	Human_Hominidae
850.USygt3.T2	Human	Human	USA	Homo sapiens	Homo sapiens_Human	Hominidae	Human_Hominidae
850.USygt30.F	Human	Human	USA	Homo sapiens	Homo sapiens_Human	Hominidae	Human_Hominidae
850.USygt30.M	Human	Human	USA	Homo sapiens	Homo sapiens_Human	Hominidae	Human_Hominidae
850.USygt30.T1	Human	Human	USA	Homo sapiens	Homo sapiens_Human	Hominidae	Human_Hominidae
850.USygt30.T2	Human	Human	USA	Homo sapiens	Homo sapiens_Human	Hominidae	Human_Hominidae
850.USygt31.M	Human	Human	USA	Homo sapiens	Homo sapiens_Human	Hominidae	Human_Hominidae
850.USygt31.T1	Human	Human	USA	Homo sapiens	Homo sapiens_Human	Hominidae	Human_Hominidae
850.USygt31.T2	Human	Human	USA	Homo sapiens	Homo sapiens_Human	Hominidae	Human_Hominidae
850.USygt32.M	Human	Human	USA	Homo sapiens	Homo sapiens_Human	Hominidae	Human_Hominidae
850.USygt32.S1	Human	Human	USA	Homo sapiens	Homo sapiens_Human	Hominidae	Human_Hominidae
850.USygt32.T1	Human	Human	USA	Homo sapiens	Homo sapiens_Human	Hominidae	Human_Hominidae
850.USygt32.T2	Human	Human	USA	Homo sapiens	Homo sapiens_Human	Hominidae	Human_Hominidae
850.USygt33.M	Human	Human	USA	Homo sapiens	Homo sapiens_Human	Hominidae	Human_Hominidae
850.USygt33.T1	Human	Human	USA	Homo sapiens	Homo sapiens_Human	Hominidae	Human_Hominidae
850.USygt33.T2	Human	Human	USA	Homo sapiens	Homo sapiens_Human	Hominidae	Human_Hominidae
850.USygt34.F	Human	Human	USA	Homo sapiens	Homo sapiens_Human	Hominidae	Human_Hominidae
850.USygt34.M	Human	Human	USA	Homo sapiens	Homo sapiens_Human	Hominidae	Human_Hominidae
850.USygt34.T1	Human	Human	USA	Homo sapiens	Homo sapiens_Human	Hominidae	Human_Hominidae
850.USygt35.M	Human	Human	USA	Homo sapiens	Homo sapiens_Human	Hominidae	Human_Hominidae
850.USygt35.T1	Human	Human	USA	Homo sapiens	Homo sapiens_Human	Hominidae	Human_Hominidae
850.USygt35.T2	Human	Human	USA	Homo sapiens	Homo sapiens_Human	Hominidae	Human_Hominidae
850.USygt36.M	Human	Human	USA	Homo sapiens	Homo sapiens_Human	Hominidae	Human_Hominidae
850.USygt36.T1	Human	Human	USA	Homo sapiens	Homo sapiens_Human	Hominidae	Human_Hominidae
850.USygt36.T2	Human	Human	USA	Homo sapiens	Homo sapiens_Human	Hominidae	Human_Hominidae
850.USygt37.B1	Human	Human	USA	Homo sapiens	Homo sapiens_Human	Hominidae	Human_Hominidae
850.USygt37.F	Human	Human	USA	Homo sapiens	Homo sapiens_Human	Hominidae	Human_Hominidae
850.USygt37.M	Human	Human	USA	Homo sapiens	Homo sapiens_Human	Hominidae	Human_Hominidae
850.USygt37.T1	Human	Human	USA	Homo sapiens	Homo sapiens_Human	Hominidae	Human_Hominidae
850.USygt37.T2	Human	Human	USA	Homo sapiens	Homo sapiens_Human	Hominidae	Human_Hominidae
850.USygt38.F	Human	Human	USA	Homo sapiens	Homo sapiens_Human	Hominidae	Human_Hominidae
850.USygt38.M	Human	Human	USA	Homo sapiens	Homo sapiens_Human	Hominidae	Human_Hominidae
850.USygt38.T1	Human	Human	USA	Homo sapiens	Homo sapiens_Human	Hominidae	Human_Hominidae
850.USygt38.T2	Human	Human	USA	Homo sapiens	Homo sapiens_Human	Hominidae	Human_Hominidae
850.USygt39.F	Human	Human	USA	Homo sapiens	Homo sapiens_Human	Hominidae	Human_Hominidae
850.USygt39.M	Human	Human	USA	Homo sapiens	Homo sapiens_Human	Hominidae	Human_Hominidae
850.USygt39.T1	Human	Human	USA	Homo sapiens	Homo sapiens_Human	Hominidae	Human_Hominidae
850.USygt39.T2	Human	Human	USA	Homo sapiens	Homo sapiens_Human	Hominidae	Human_Hominidae
850.USygt4.F	Human	Human	USA	Homo sapiens	Homo sapiens_Human	Hominidae	Human_Hominidae
850.USygt4.M	Human	Human	USA	Homo sapiens	Homo sapiens_Human	Hominidae	Human_Hominidae
850.USygt4.T1	Human	Human	USA	Homo sapiens	Homo sapiens_Human	Hominidae	Human_Hominidae
850.USygt4.T2	Human	Human	USA	Homo sapiens	Homo sapiens_Human	Hominidae	Human_Hominidae
850.USygt40.F	Human	Human	USA	Homo sapiens	Homo sapiens_Human	Hominidae	Human_Hominidae
850.USygt40.M	Human	Human	USA	Homo sapiens	Homo sapiens_Human	Hominidae	Human_Hominidae
850.USygt40.T1	Human	Human	USA	Homo sapiens	Homo sapiens_Human	Hominidae	Human_Hominidae
850.USygt40.T2	Human	Human	USA	Homo sapiens	Homo sapiens_Human	Hominidae	Human_Hominidae
850.USygt41.B1	Human	Human	USA	Homo sapiens	Homo sapiens_Human	Hominidae	Human_Hominidae
850.USygt41.F	Human	Human	USA	Homo sapiens	Homo sapiens_Human	Hominidae	Human_Hominidae
850.USygt41.M	Human	Human	USA	Homo sapiens	Homo sapiens_Human	Hominidae	Human_Hominidae
850.USygt41.T1	Human	Human	USA	Homo sapiens	Homo sapiens_Human	Hominidae	Human_Hominidae
850.USygt41.T2	Human	Human	USA	Homo sapiens	Homo sapiens_Human	Hominidae	Human_Hominidae
850.USygt42.F	Human	Human	USA	Homo sapiens	Homo sapiens_Human	Hominidae	Human_Hominidae
850.USygt42.M	Human	Human	USA	Homo sapiens	Homo sapiens_Human	Hominidae	Human_Hominidae
850.USygt42.T1	Human	Human	USA	Homo sapiens	Homo sapiens_Human	Hominidae	Human_Hominidae
850.USygt42.T2	Human	Human	USA	Homo sapiens	Homo sapiens_Human	Hominidae	Human_Hominidae
850.USygt43.F	Human	Human	USA	Homo sapiens	Homo sapiens_Human	Hominidae	Human_Hominidae
850.USygt43.M	Human	Human	USA	Homo sapiens	Homo sapiens_Human	Hominidae	Human_Hominidae
850.USygt43.T1	Human	Human	USA	Homo sapiens	Homo sapiens_Human	Hominidae	Human_Hominidae
850.USygt43.T2	Human	Human	USA	Homo sapiens	Homo sapiens_Human	Hominidae	Human_Hominidae
850.USygt44.B1	Human	Human	USA	Homo sapiens	Homo sapiens_Human	Hominidae	Human_Hominidae
850.USygt44.F	Human	Human	USA	Homo sapiens	Homo sapiens_Human	Hominidae	Human_Hominidae
850.USygt44.M	Human	Human	USA	Homo sapiens	Homo sapiens_Human	Hominidae	Human_Hominidae
850.USygt44.T1	Human	Human	USA	Homo sapiens	Homo sapiens_Human	Hominidae	Human_Hominidae
850.USygt44.T2	Human	Human	USA	Homo sapiens	Homo sapiens_Human	Hominidae	Human_Hominidae
850.USygt45.F	Human	Human	USA	Homo sapiens	Homo sapiens_Human	Hominidae	Human_Hominidae
850.USygt45.M	Human	Human	USA	Homo sapiens	Homo sapiens_Human	Hominidae	Human_Hominidae
850.USygt45.T1	Human	Human	USA	Homo sapiens	Homo sapiens_Human	Hominidae	Human_Hominidae
850.USygt45.T2	Human	Human	USA	Homo sapiens	Homo sapiens_Human	Hominidae	Human_Hominidae
850.USygt46.F	Human	Human	USA	Homo sapiens	Homo sapiens_Human	Hominidae	Human_Hominidae
850.USygt46.M	Human	Human	USA	Homo sapiens	Homo sapiens_Human	Hominidae	Human_Hominidae
850.USygt46.T1	Human	Human	USA	Homo sapiens	Homo sapiens_Human	Hominidae	Human_Hominidae
850.USygt46.T2	Human	Human	USA	Homo sapiens	Homo sapiens_Human	Hominidae	Human_Hominidae
850.USygt47.F	Human	Human	USA	Homo sapiens	Homo sapiens_Human	Hominidae	Human_Hominidae
850.USygt47.M	Human	Human	USA	Homo sapiens	Homo sapiens_Human	Hominidae	Human_Hominidae
850.USygt47.T1	Human	Human	USA	Homo sapiens	Homo sapiens_Human	Hominidae	Human_Hominidae
850.USygt47.T2	Human	Human	USA	Homo sapiens	Homo sapiens_Human	Hominidae	Human_Hominidae
850.USygt48.F	Human	Human	USA	Homo sapiens	Homo sapiens_Human	Hominidae	Human_Hominidae
850.USygt48.M	Human	Human	USA	Homo sapiens	Homo sapiens_Human	Hominidae	Human_Hominidae
850.USygt48.T1	Human	Human	USA	Homo sapiens	Homo sapiens_Human	Hominidae	Human_Hominidae
850.USygt48.T2	Human	Human	USA	Homo sapiens	Homo sapiens_Human	Hominidae	Human_Hominidae
850.USygt49.B1	Human	Human	USA	Homo sapiens	Homo sapiens_Human	Hominidae	Human_Hominidae
850.USygt49.F	Human	Human	USA	Homo sapiens	Homo sapiens_Human	Hominidae	Human_Hominidae
850.USygt49.M	Human	Human	USA	Homo sapiens	Homo sapiens_Human	Hominidae	Human_Hominidae
850.USygt49.T1	Human	Human	USA	Homo sapiens	Homo sapiens_Human	Hominidae	Human_Hominidae
850.USygt49.T2	Human	Human	USA	Homo sapiens	Homo sapiens_Human	Hominidae	Human_Hominidae
850.USygt5.F	Human	Human	USA	Homo sapiens	Homo sapiens_Human	Hominidae	Human_Hominidae
850.USygt5.M	Human	Human	USA	Homo sapiens	Homo sapiens_Human	Hominidae	Human_Hominidae
850.USygt5.T1	Human	Human	USA	Homo sapiens	Homo sapiens_Human	Hominidae	Human_Hominidae
850.USygt5.T2	Human	Human	USA	Homo sapiens	Homo sapiens_Human	Hominidae	Human_Hominidae
850.USygt50.F	Human	Human	USA	Homo sapiens	Homo sapiens_Human	Hominidae	Human_Hominidae
850.USygt50.M	Human	Human	USA	Homo sapiens	Homo sapiens_Human	Hominidae	Human_Hominidae
850.USygt50.T1	Human	Human	USA	Homo sapiens	Homo sapiens_Human	Hominidae	Human_Hominidae
850.USygt50.T2	Human	Human	USA	Homo sapiens	Homo sapiens_Human	Hominidae	Human_Hominidae
850.USygt51.F	Human	Human	USA	Homo sapiens	Homo sapiens_Human	Hominidae	Human_Hominidae
850.USygt51.M	Human	Human	USA	Homo sapiens	Homo sapiens_Human	Hominidae	Human_Hominidae
850.USygt51.T1	Human	Human	USA	Homo sapiens	Homo sapiens_Human	Hominidae	Human_Hominidae
850.USygt51.T2	Human	Human	USA	Homo sapiens	Homo sapiens_Human	Hominidae	Human_Hominidae
850.USygt52.F	Human	Human	USA	Homo sapiens	Homo sapiens_Human	Hominidae	Human_Hominidae
850.USygt52.M	Human	Human	USA	Homo sapiens	Homo sapiens_Human	Hominidae	Human_Hominidae
850.USygt52.T1	Human	Human	USA	Homo sapiens	Homo sapiens_Human	Hominidae	Human_Hominidae
850.USygt52.T2	Human	Human	USA	Homo sapiens	Homo sapiens_Human	Hominidae	Human_Hominidae
850.USygt53.F	Human	Human	USA	Homo sapiens	Homo sapiens_Human	Hominidae	Human_Hominidae
850.USygt53.M	Human	Human	USA	Homo sapiens	Homo sapiens_Human	Hominidae	Human_Hominidae
850.USygt53.T1	Human	Human	USA	Homo sapiens	Homo sapiens_Human	Hominidae	Human_Hominidae
850.USygt53.T2	Human	Human	USA	Homo sapiens	Homo sapiens_Human	Hominidae	Human_Hominidae
850.USygt54.AS	Human	Human	USA	Homo sapiens	Homo sapiens_Human	Hominidae	Human_Hominidae
850.USygt54.F	Human	Human	USA	Homo sapiens	Homo sapiens_Human	Hominidae	Human_Hominidae
850.USygt54.M	Human	Human	USA	Homo sapiens	Homo sapiens_Human	Hominidae	Human_Hominidae
850.USygt54.T1	Human	Human	USA	Homo sapiens	Homo sapiens_Human	Hominidae	Human_Hominidae
850.USygt54.T2	Human	Human	USA	Homo sapiens	Homo sapiens_Human	Hominidae	Human_Hominidae
850.USygt6.AS	Human	Human	USA	Homo sapiens	Homo sapiens_Human	Hominidae	Human_Hominidae
850.USygt6.M	Human	Human	USA	Homo sapiens	Homo sapiens_Human	Hominidae	Human_Hominidae
850.USygt6.T2	Human	Human	USA	Homo sapiens	Homo sapiens_Human	Hominidae	Human_Hominidae
850.USygt7.M	Human	Human	USA	Homo sapiens	Homo sapiens_Human	Hominidae	Human_Hominidae
850.USygt7.T1	Human	Human	USA	Homo sapiens	Homo sapiens_Human	Hominidae	Human_Hominidae
850.USygt7.T2	Human	Human	USA	Homo sapiens	Homo sapiens_Human	Hominidae	Human_Hominidae
850.USygt8.F	Human	Human	USA	Homo sapiens	Homo sapiens_Human	Hominidae	Human_Hominidae
850.USygt8.M	Human	Human	USA	Homo sapiens	Homo sapiens_Human	Hominidae	Human_Hominidae
850.USygt8.T1	Human	Human	USA	Homo sapiens	Homo sapiens_Human	Hominidae	Human_Hominidae
850.USygt8.T2	Human	Human	USA	Homo sapiens	Homo sapiens_Human	Hominidae	Human_Hominidae
850.USygt9.B1	Human	Human	USA	Homo sapiens	Homo sapiens_Human	Hominidae	Human_Hominidae
850.USygt9.F	Human	Human	USA	Homo sapiens	Homo sapiens_Human	Hominidae	Human_Hominidae
850.USygt9.M	Human	Human	USA	Homo sapiens	Homo sapiens_Human	Hominidae	Human_Hominidae
850.USygt9.T1	Human	Human	USA	Homo sapiens	Homo sapiens_Human	Hominidae	Human_Hominidae
850.USygt9.T2	Human	Human	USA	Homo sapiens	Homo sapiens_Human	Hominidae	Human_Hominidae
850.h101A.3	Human	Human	Malawi	Homo sapiens	Homo sapiens_Human	Hominidae	Human_Hominidae
850.h101B.3	Human	Human	Malawi	Homo sapiens	Homo sapiens_Human	Hominidae	Human_Hominidae
850.h101M.1	Human	Human	Malawi	Homo sapiens	Homo sapiens_Human	Hominidae	Human_Hominidae
850.h101S.1	Human	Human	Malawi	Homo sapiens	Homo sapiens_Human	Hominidae	Human_Hominidae
850.h10A.1	Human	Human	Malawi	Homo sapiens	Homo sapiens_Human	Hominidae	Human_Hominidae
850.h10M.1	Human	Human	Malawi	Homo sapiens	Homo sapiens_Human	Hominidae	Human_Hominidae
850.h121A.1	Human	Human	Malawi	Homo sapiens	Homo sapiens_Human	Hominidae	Human_Hominidae
850.h121B.1	Human	Human	Malawi	Homo sapiens	Homo sapiens_Human	Hominidae	Human_Hominidae
850.h121S.1	Human	Human	Malawi	Homo sapiens	Homo sapiens_Human	Hominidae	Human_Hominidae
850.h122M.1	Human	Human	Malawi	Homo sapiens	Homo sapiens_Human	Hominidae	Human_Hominidae
850.h122S.1	Human	Human	Malawi	Homo sapiens	Homo sapiens_Human	Hominidae	Human_Hominidae
850.h128A.1	Human	Human	Malawi	Homo sapiens	Homo sapiens_Human	Hominidae	Human_Hominidae
850.h128M.1	Human	Human	Malawi	Homo sapiens	Homo sapiens_Human	Hominidae	Human_Hominidae
850.h128S.1	Human	Human	Malawi	Homo sapiens	Homo sapiens_Human	Hominidae	Human_Hominidae
850.h130A.4	Human	Human	Malawi	Homo sapiens	Homo sapiens_Human	Hominidae	Human_Hominidae
850.h130B.4	Human	Human	Malawi	Homo sapiens	Homo sapiens_Human	Hominidae	Human_Hominidae
850.h130M.1	Human	Human	Malawi	Homo sapiens	Homo sapiens_Human	Hominidae	Human_Hominidae
850.h130S.1	Human	Human	Malawi	Homo sapiens	Homo sapiens_Human	Hominidae	Human_Hominidae
850.h144A.1	Human	Human	Malawi	Homo sapiens	Homo sapiens_Human	Hominidae	Human_Hominidae
850.h144B.1	Human	Human	Malawi	Homo sapiens	Homo sapiens_Human	Hominidae	Human_Hominidae
850.h144M.1	Human	Human	Malawi	Homo sapiens	Homo sapiens_Human	Hominidae	Human_Hominidae
850.h146A.4	Human	Human	Malawi	Homo sapiens	Homo sapiens_Human	Hominidae	Human_Hominidae
850.h146B.4	Human	Human	Malawi	Homo sapiens	Homo sapiens_Human	Hominidae	Human_Hominidae
850.h146M.1	Human	Human	Malawi	Homo sapiens	Homo sapiens_Human	Hominidae	Human_Hominidae
850.h147A.4	Human	Human	Malawi	Homo sapiens	Homo sapiens_Human	Hominidae	Human_Hominidae
850.h147B.4	Human	Human	Malawi	Homo sapiens	Homo sapiens_Human	Hominidae	Human_Hominidae
850.h147M.1	Human	Human	Malawi	Homo sapiens	Homo sapiens_Human	Hominidae	Human_Hominidae
850.h165A.1	Human	Human	Malawi	Homo sapiens	Homo sapiens_Human	Hominidae	Human_Hominidae
850.h165B.1	Human	Human	Malawi	Homo sapiens	Homo sapiens_Human	Hominidae	Human_Hominidae
850.h165M.1	Human	Human	Malawi	Homo sapiens	Homo sapiens_Human	Hominidae	Human_Hominidae
850.h165S.1	Human	Human	Malawi	Homo sapiens	Homo sapiens_Human	Hominidae	Human_Hominidae
850.h181A.1	Human	Human	Malawi	Homo sapiens	Homo sapiens_Human	Hominidae	Human_Hominidae
850.h181B.1	Human	Human	Malawi	Homo sapiens	Homo sapiens_Human	Hominidae	Human_Hominidae
850.h181C.1	Human	Human	Malawi	Homo sapiens	Homo sapiens_Human	Hominidae	Human_Hominidae
850.h181M.1	Human	Human	Malawi	Homo sapiens	Homo sapiens_Human	Hominidae	Human_Hominidae
850.h181S.1	Human	Human	Malawi	Homo sapiens	Homo sapiens_Human	Hominidae	Human_Hominidae
850.h186A.1	Human	Human	Malawi	Homo sapiens	Homo sapiens_Human	Hominidae	Human_Hominidae
850.h186B.1	Human	Human	Malawi	Homo sapiens	Homo sapiens_Human	Hominidae	Human_Hominidae
850.h186C.1	Human	Human	Malawi	Homo sapiens	Homo sapiens_Human	Hominidae	Human_Hominidae
850.h186M.1	Human	Human	Malawi	Homo sapiens	Homo sapiens_Human	Hominidae	Human_Hominidae
850.h186S.1	Human	Human	Malawi	Homo sapiens	Homo sapiens_Human	Hominidae	Human_Hominidae
850.h18A.4	Human	Human	Malawi	Homo sapiens	Homo sapiens_Human	Hominidae	Human_Hominidae
850.h18B.4	Human	Human	Malawi	Homo sapiens	Homo sapiens_Human	Hominidae	Human_Hominidae
850.h208A.1	Human	Human	Malawi	Homo sapiens	Homo sapiens_Human	Hominidae	Human_Hominidae
850.h208M.1	Human	Human	Malawi	Homo sapiens	Homo sapiens_Human	Hominidae	Human_Hominidae
850.h209A.2	Human	Human	Malawi	Homo sapiens	Homo sapiens_Human	Hominidae	Human_Hominidae
850.h209B.2	Human	Human	Malawi	Homo sapiens	Homo sapiens_Human	Hominidae	Human_Hominidae
850.h209M.1	Human	Human	Malawi	Homo sapiens	Homo sapiens_Human	Hominidae	Human_Hominidae
850.h209S.1	Human	Human	Malawi	Homo sapiens	Homo sapiens_Human	Hominidae	Human_Hominidae
850.h228M.1	Human	Human	Malawi	Homo sapiens	Homo sapiens_Human	Hominidae	Human_Hominidae
850.h228S.1	Human	Human	Malawi	Homo sapiens	Homo sapiens_Human	Hominidae	Human_Hominidae
850.h235A.1	Human	Human	Malawi	Homo sapiens	Homo sapiens_Human	Hominidae	Human_Hominidae
850.h235B.1	Human	Human	Malawi	Homo sapiens	Homo sapiens_Human	Hominidae	Human_Hominidae
850.h235M.1	Human	Human	Malawi	Homo sapiens	Homo sapiens_Human	Hominidae	Human_Hominidae
850.h257A.1	Human	Human	Malawi	Homo sapiens	Homo sapiens_Human	Hominidae	Human_Hominidae
850.h257B.1	Human	Human	Malawi	Homo sapiens	Homo sapiens_Human	Hominidae	Human_Hominidae
850.h257M.1	Human	Human	Malawi	Homo sapiens	Homo sapiens_Human	Hominidae	Human_Hominidae
850.h257S.1	Human	Human	Malawi	Homo sapiens	Homo sapiens_Human	Hominidae	Human_Hominidae
850.h259A.2	Human	Human	Malawi	Homo sapiens	Homo sapiens_Human	Hominidae	Human_Hominidae
850.h259B.2	Human	Human	Malawi	Homo sapiens	Homo sapiens_Human	Hominidae	Human_Hominidae
850.h259M.1	Human	Human	Malawi	Homo sapiens	Homo sapiens_Human	Hominidae	Human_Hominidae
850.h259S.1	Human	Human	Malawi	Homo sapiens	Homo sapiens_Human	Hominidae	Human_Hominidae
850.h264A.2	Human	Human	Malawi	Homo sapiens	Homo sapiens_Human	Hominidae	Human_Hominidae
850.h264B.2	Human	Human	Malawi	Homo sapiens	Homo sapiens_Human	Hominidae	Human_Hominidae
850.h264M.1	Human	Human	Malawi	Homo sapiens	Homo sapiens_Human	Hominidae	Human_Hominidae
850.h273A.2	Human	Human	Malawi	Homo sapiens	Homo sapiens_Human	Hominidae	Human_Hominidae
850.h273B.2	Human	Human	Malawi	Homo sapiens	Homo sapiens_Human	Hominidae	Human_Hominidae
850.h273M.1	Human	Human	Malawi	Homo sapiens	Homo sapiens_Human	Hominidae	Human_Hominidae
850.h279A.2	Human	Human	Malawi	Homo sapiens	Homo sapiens_Human	Hominidae	Human_Hominidae
850.h279B.2	Human	Human	Malawi	Homo sapiens	Homo sapiens_Human	Hominidae	Human_Hominidae
850.h279M.1	Human	Human	Malawi	Homo sapiens	Homo sapiens_Human	Hominidae	Human_Hominidae
850.h279S.1	Human	Human	Malawi	Homo sapiens	Homo sapiens_Human	Hominidae	Human_Hominidae
850.h301A.1	Human	Human	Malawi	Homo sapiens	Homo sapiens_Human	Hominidae	Human_Hominidae
850.h301B.1	Human	Human	Malawi	Homo sapiens	Homo sapiens_Human	Hominidae	Human_Hominidae
850.h301M.1	Human	Human	Malawi	Homo sapiens	Homo sapiens_Human	Hominidae	Human_Hominidae
850.h305B.2	Human	Human	Malawi	Homo sapiens	Homo sapiens_Human	Hominidae	Human_Hominidae
850.h305C.2	Human	Human	Malawi	Homo sapiens	Homo sapiens_Human	Hominidae	Human_Hominidae
850.h305M.1	Human	Human	Malawi	Homo sapiens	Homo sapiens_Human	Hominidae	Human_Hominidae
850.h35A.3	Human	Human	Malawi	Homo sapiens	Homo sapiens_Human	Hominidae	Human_Hominidae
850.h35S.1	Human	Human	Malawi	Homo sapiens	Homo sapiens_Human	Hominidae	Human_Hominidae
850.h37A.1	Human	Human	Malawi	Homo sapiens	Homo sapiens_Human	Hominidae	Human_Hominidae
850.h37B.1	Human	Human	Malawi	Homo sapiens	Homo sapiens_Human	Hominidae	Human_Hominidae
850.h37M.1	Human	Human	Malawi	Homo sapiens	Homo sapiens_Human	Hominidae	Human_Hominidae
850.h37S.1	Human	Human	Malawi	Homo sapiens	Homo sapiens_Human	Hominidae	Human_Hominidae
850.h47A.1	Human	Human	Malawi	Homo sapiens	Homo sapiens_Human	Hominidae	Human_Hominidae
850.h47B.1	Human	Human	Malawi	Homo sapiens	Homo sapiens_Human	Hominidae	Human_Hominidae
850.h47M.1	Human	Human	Malawi	Homo sapiens	Homo sapiens_Human	Hominidae	Human_Hominidae
850.h47S.1	Human	Human	Malawi	Homo sapiens	Homo sapiens_Human	Hominidae	Human_Hominidae
850.h60A.2	Human	Human	Malawi	Homo sapiens	Homo sapiens_Human	Hominidae	Human_Hominidae
850.h60B.2	Human	Human	Malawi	Homo sapiens	Homo sapiens_Human	Hominidae	Human_Hominidae
850.h60M.1	Human	Human	Malawi	Homo sapiens	Homo sapiens_Human	Hominidae	Human_Hominidae
850.h60S.1	Human	Human	Malawi	Homo sapiens	Homo sapiens_Human	Hominidae	Human_Hominidae
850.h68A.4	Human	Human	Malawi	Homo sapiens	Homo sapiens_Human	Hominidae	Human_Hominidae
850.h68B.4	Human	Human	Malawi	Homo sapiens	Homo sapiens_Human	Hominidae	Human_Hominidae
850.h68M.1	Human	Human	Malawi	Homo sapiens	Homo sapiens_Human	Hominidae	Human_Hominidae
850.h78A.4	Human	Human	Malawi	Homo sapiens	Homo sapiens_Human	Hominidae	Human_Hominidae
850.h78B.4	Human	Human	Malawi	Homo sapiens	Homo sapiens_Human	Hominidae	Human_Hominidae
850.h78M.1	Human	Human	Malawi	Homo sapiens	Homo sapiens_Human	Hominidae	Human_Hominidae
850.h78S.1	Human	Human	Malawi	Homo sapiens	Homo sapiens_Human	Hominidae	Human_Hominidae
850.h85A.1	Human	Human	Malawi	Homo sapiens	Homo sapiens_Human	Hominidae	Human_Hominidae
850.h85B.1	Human	Human	Malawi	Homo sapiens	Homo sapiens_Human	Hominidae	Human_Hominidae
850.h85M.1	Human	Human	Malawi	Homo sapiens	Homo sapiens_Human	Hominidae	Human_Hominidae
850.h85S.1	Human	Human	Malawi	Homo sapiens	Homo sapiens_Human	Hominidae	Human_Hominidae
850.h95A.1	Human	Human	Malawi	Homo sapiens	Homo sapiens_Human	Hominidae	Human_Hominidae
850.h95B.1	Human	Human	Malawi	Homo sapiens	Homo sapiens_Human	Hominidae	Human_Hominidae
850.h95M.1	Human	Human	Malawi	Homo sapiens	Homo sapiens_Human	Hominidae	Human_Hominidae
850.h95S.1	Human	Human	Malawi	Homo sapiens	Homo sapiens_Human	Hominidae	Human_Hominidae
850.h9A.5	Human	Human	Malawi	Homo sapiens	Homo sapiens_Human	Hominidae	Human_Hominidae
850.h9B.5	Human	Human	Malawi	Homo sapiens	Homo sapiens_Human	Hominidae	Human_Hominidae
850.h9M.1	Human	Human	Malawi	Homo sapiens	Homo sapiens_Human	Hominidae	Human_Hominidae
850.h9S.1	Human	Human	Malawi	Homo sapiens	Homo sapiens_Human	Hominidae	Human_Hominidae
850.k278A.2	Human	Human	Malawi	Homo sapiens	Homo sapiens_Human	Hominidae	Human_Hominidae
850.k278B.2	Human	Human	Malawi	Homo sapiens	Homo sapiens_Human	Hominidae	Human_Hominidae
850.k278M.1	Human	Human	Malawi	Homo sapiens	Homo sapiens_Human	Hominidae	Human_Hominidae
10936.ATL.24592.lemur	captive	Ringtailed lemur	USA	Lemur catta	Lemur catta_captive	Lemuridae	captive_Lemuridae
10936.FD.0447.lemur	captive	Ringedtail lemur	France	Lemur catta	Lemur catta_captive	Lemuridae	captive_Lemuridae
10936.FD.0472.lemur	captive	Ringedtail lemur	France	Lemur catta	Lemur catta_captive	Lemuridae	captive_Lemuridae
10936.Lc155.ringtailedlemur	wild	Ringtailed lemur	Madagascar	Lemur catta	Lemur catta_wild	Lemuridae	wild_Lemuridae
10936.Lc172.ringtailedlemur	wild	Ringtailed lemur	Madagascar	Lemur catta	Lemur catta_wild	Lemuridae	wild_Lemuridae
10936.Lc23.ringtailedlemur	wild	Ringtailed lemur	Madagascar	Lemur catta	Lemur catta_wild	Lemuridae	wild_Lemuridae
10936.Lc259.ringtailedlemur	wild	Ringtailed lemur	Madagascar	Lemur catta	Lemur catta_wild	Lemuridae	wild_Lemuridae
10936.Lc268.ringtailedlemur	wild	Ringtailed lemur	Madagascar	Lemur catta	Lemur catta_wild	Lemuridae	wild_Lemuridae
10936.Lc301.ringtailedlemur	wild	Ringtailed lemur	Madagascar	Lemur catta	Lemur catta_wild	Lemuridae	wild_Lemuridae
10936.Lc316.ringtailedlemur	wild	Ringtailed lemur	Madagascar	Lemur catta	Lemur catta_wild	Lemuridae	wild_Lemuridae
10936.Lc318.ringtailedlemur	wild	Ringtailed lemur	Madagascar	Lemur catta	Lemur catta_wild	Lemuridae	wild_Lemuridae
10936.Lc331.ringtailedlemur	wild	Ringtailed lemur	Madagascar	Lemur catta	Lemur catta_wild	Lemuridae	wild_Lemuridae
10936.Lc336.ringtailedlemur	wild	Ringtailed lemur	Madagascar	Lemur catta	Lemur catta_wild	Lemuridae	wild_Lemuridae
10936.FD.0268.wilddog	captive	African wild dog	France	Lycaon pictus	Lycaon pictus_captive	Canidae	captive_Canidae
10936.TS.207.wilddog	wild	African wild dog	South Africa	Lycaon pictus	Lycaon pictus_wild	Canidae	wild_Canidae
10936.TS.208.wilddog	wild	African wild dog	South Africa	Lycaon pictus	Lycaon pictus_wild	Canidae	wild_Canidae
10936.TS.209.wilddog	wild	African wild dog	South Africa	Lycaon pictus	Lycaon pictus_wild	Canidae	wild_Canidae
10936.TS.210.wilddog	wild	African wild dog	South Africa	Lycaon pictus	Lycaon pictus_wild	Canidae	wild_Canidae
10936.NATL.24654.phorse	captive	przewalski horse	USA	Missing: Not provided	Equus przewalski_captive	Equidae	captive_Equidae
10936.NATL.24666.phorse	captive	przewalski horse	USA	Missing: Not provided	Equus przewalski_captive	Equidae	captive_Equidae
10936.NATL.24711.phorse	captive	przewalski horse	USA	Missing: Not provided	Equus przewalski_captive	Equidae	captive_Equidae
10936.NATL.25072.phorse	captive	przewalski horse	USA	Missing: Not provided	Equus przewalski_captive	Equidae	captive_Equidae
10936.Przw.6AR.RNAL1.Phorse	wild	Przewalskiis horse	Mongolia	Missing: Not provided	Equus przewalski_wild	Equidae	wild_Equidae
10936.Przw.6CR.RNAL2.Phorse	wild	Przewalskiis horse	Mongolia	Missing: Not provided	Equus przewalski_wild	Equidae	wild_Equidae
10936.Przw.7MY.RNAL1.Phorse	wild	Przewalskiis horse	Mongolia	Missing: Not provided	Equus przewalski_wild	Equidae	wild_Equidae
10936.Przw.8SY.RNAL1.Phorse	wild	Przewalskiis horse	Mongolia	Missing: Not provided	Equus przewalski_wild	Equidae	wild_Equidae
10936.Myr.tri.Mont.1.0.653693.Giantanteater	captive	Giant anteater	France	Myrmecophaga tridactyla	Myrmecophaga tridactyla_captive	Myrmecophagidae	captive_Myrmecophagidae
10936.Myr.tri.Mont.1.1.653732.Giantanteater	captive	Giant anteater	France	Myrmecophaga tridactyla	Myrmecophaga tridactyla_captive	Myrmecophagidae	captive_Myrmecophagidae
10936.Myr.tri.Mont.1.2.653674.Giantanteater	captive	Giant anteater	France	Myrmecophaga tridactyla	Myrmecophaga tridactyla_captive	Myrmecophagidae	captive_Myrmecophagidae
10936.Myr.tri.Mont.2.0.653718.Giantanteater	captive	Giant anteater	France	Myrmecophaga tridactyla	Myrmecophaga tridactyla_captive	Myrmecophagidae	captive_Myrmecophagidae
10936.Myr.tri.Mont.2.1.653695.Giantanteater	captive	Giant anteater	France	Myrmecophaga tridactyla	Myrmecophaga tridactyla_captive	Myrmecophagidae	captive_Myrmecophagidae
10936.NATL.25062.anteater	captive	giant anteater	USA	Myrmecophaga tridactyla	Myrmecophaga tridactyla_captive	Myrmecophagidae	captive_Myrmecophagidae
10936.NATL.25080.anteater	captive	giant anteater	USA	Myrmecophaga tridactyla	Myrmecophaga tridactyla_captive	Myrmecophagidae	captive_Myrmecophagidae
10936.NATL.25181.anteater	captive	giant anteater	USA	Myrmecophaga tridactyla	Myrmecophaga tridactyla_captive	Myrmecophagidae	captive_Myrmecophagidae
10936.NATL.25184.anteater	captive	giant anteater	USA	Myrmecophaga tridactyla	Myrmecophaga tridactyla_captive	Myrmecophagidae	captive_Myrmecophagidae
10936.ZU.18257.anteater	captive	Giant anteater	Switzerland	Myrmecophaga tridactyla	Myrmecophaga tridactyla_captive	Myrmecophagidae	captive_Myrmecophagidae
10936.ZU.18269.anteater	captive	Giant anteater	Switzerland	Myrmecophaga tridactyla	Myrmecophaga tridactyla_captive	Myrmecophagidae	captive_Myrmecophagidae
10936.Myr.tri.Seat.05D02.653714.Giantanteater	wild	Giant anteater	Brazil	Myrmecophaga tridactyla	Myrmecophaga tridactyla_wild	Myrmecophagidae	wild_Myrmecophagidae
10936.Myr.tri.Seat.1.03E03.653736.Giantanteater	wild	Giant anteater	Brazil	Myrmecophaga tridactyla	Myrmecophaga tridactyla_wild	Myrmecophagidae	wild_Myrmecophagidae
10936.Myr.tri.Seat.1.04J06.653681.Giantanteater	wild	Giant anteater	Brazil	Myrmecophaga tridactyla	Myrmecophaga tridactyla_wild	Myrmecophagidae	wild_Myrmecophagidae
10936.Myr.tri.Seat.1.07C04.653723.Giantanteater	wild	Giant anteater	Brazil	Myrmecophaga tridactyla	Myrmecophaga tridactyla_wild	Myrmecophagidae	wild_Myrmecophagidae
10936.Myr.tri.Seat.10.04F05.653662.Giantanteater	wild	Giant anteater	Brazil	Myrmecophaga tridactyla	Myrmecophaga tridactyla_wild	Myrmecophagidae	wild_Myrmecophagidae
10936.Myr.tri.Seat.11.04F02.653710.Giantanteater	wild	Giant anteater	Brazil	Myrmecophaga tridactyla	Myrmecophaga tridactyla_wild	Myrmecophagidae	wild_Myrmecophagidae
10936.Myr.tri.Seat.12.04F01.653678.Giantanteater	wild	Giant anteater	Brazil	Myrmecophaga tridactyla	Myrmecophaga tridactyla_wild	Myrmecophagidae	wild_Myrmecophagidae
10936.Myr.tri.Seat.13.04I17.653705.Giantanteater	wild	Giant anteater	Brazil	Myrmecophaga tridactyla	Myrmecophaga tridactyla_wild	Myrmecophagidae	wild_Myrmecophagidae
10936.Myr.tri.Seat.14.04K04.653703.Giantanteater	wild	Giant anteater	Brazil	Myrmecophaga tridactyla	Myrmecophaga tridactyla_wild	Myrmecophagidae	wild_Myrmecophagidae
10936.Myr.tri.Seat.15.04D01.653679.Giantanteater	wild	Giant anteater	Brazil	Myrmecophaga tridactyla	Myrmecophaga tridactyla_wild	Myrmecophagidae	wild_Myrmecophagidae
10936.Myr.tri.Seat.16.04I10.653731.Giantanteater	wild	Giant anteater	Brazil	Myrmecophaga tridactyla	Myrmecophaga tridactyla_wild	Myrmecophagidae	wild_Myrmecophagidae
10936.Myr.tri.Seat.17.04K13.653726.Giantanteater	wild	Giant anteater	Brazil	Myrmecophaga tridactyla	Myrmecophaga tridactyla_wild	Myrmecophagidae	wild_Myrmecophagidae
10936.Myr.tri.Seat.18.04L01.653719.Giantanteater	wild	Giant anteater	Brazil	Myrmecophaga tridactyla	Myrmecophaga tridactyla_wild	Myrmecophagidae	wild_Myrmecophagidae
10936.Myr.tri.Seat.19.04L18.653752.Giantanteater	wild	Giant anteater	Brazil	Myrmecophaga tridactyla	Myrmecophaga tridactyla_wild	Myrmecophagidae	wild_Myrmecophagidae
10936.Myr.tri.Seat.2.03G06.653743.Giantanteater	wild	Giant anteater	Brazil	Myrmecophaga tridactyla	Myrmecophaga tridactyla_wild	Myrmecophagidae	wild_Myrmecophagidae
10936.Myr.tri.Seat.20.04K11.653698.Giantanteater	wild	Giant anteater	Brazil	Myrmecophaga tridactyla	Myrmecophaga tridactyla_wild	Myrmecophagidae	wild_Myrmecophagidae
10936.Myr.tri.Seat.21.04K01.653690.Giantanteater	wild	Giant anteater	Brazil	Myrmecophaga tridactyla	Myrmecophaga tridactyla_wild	Myrmecophagidae	wild_Myrmecophagidae
10936.Myr.tri.Seat.22.04K17.653666.Giantanteater	wild	Giant anteater	Brazil	Myrmecophaga tridactyla	Myrmecophaga tridactyla_wild	Myrmecophagidae	wild_Myrmecophagidae
10936.Myr.tri.Seat.23.04L06.653737.Giantanteater	wild	Giant anteater	Brazil	Myrmecophaga tridactyla	Myrmecophaga tridactyla_wild	Myrmecophagidae	wild_Myrmecophagidae
10936.Myr.tri.Seat.24.04L12.653667.Giantanteater	wild	Giant anteater	Brazil	Myrmecophaga tridactyla	Myrmecophaga tridactyla_wild	Myrmecophagidae	wild_Myrmecophagidae
10936.Myr.tri.Seat.25.04I12.653699.Giantanteater	wild	Giant anteater	Brazil	Myrmecophaga tridactyla	Myrmecophaga tridactyla_wild	Myrmecophagidae	wild_Myrmecophagidae
10936.Myr.tri.Seat.26.04K16.653682.Giantanteater	wild	Giant anteater	Brazil	Myrmecophaga tridactyla	Myrmecophaga tridactyla_wild	Myrmecophagidae	wild_Myrmecophagidae
10936.Myr.tri.Seat.27.04K10.653702.Giantanteater	wild	Giant anteater	Brazil	Myrmecophaga tridactyla	Myrmecophaga tridactyla_wild	Myrmecophagidae	wild_Myrmecophagidae
10936.Myr.tri.Seat.3.03O02.653696.Giantanteater	wild	Giant anteater	Brazil	Myrmecophaga tridactyla	Myrmecophaga tridactyla_wild	Myrmecophagidae	wild_Myrmecophagidae
10936.Myr.tri.Seat.4.03H10.653706.Giantanteater	wild	Giant anteater	Brazil	Myrmecophaga tridactyla	Myrmecophaga tridactyla_wild	Myrmecophagidae	wild_Myrmecophagidae
10936.Myr.tri.Seat.5.3502.653738.Giantanteater	wild	Giant anteater	Brazil	Myrmecophaga tridactyla	Myrmecophaga tridactyla_wild	Myrmecophagidae	wild_Myrmecophagidae
10936.Myr.tri.Seat.6.04K03.653740.Giantanteater	wild	Giant anteater	Brazil	Myrmecophaga tridactyla	Myrmecophaga tridactyla_wild	Myrmecophagidae	wild_Myrmecophagidae
10936.Myr.tri.Seat.7.04F07.653680.Giantanteater	wild	Giant anteater	Brazil	Myrmecophaga tridactyla	Myrmecophaga tridactyla_wild	Myrmecophagidae	wild_Myrmecophagidae
10936.Myr.tri.Seat.8.04I18.653676.Giantanteater	wild	Giant anteater	Brazil	Myrmecophaga tridactyla	Myrmecophaga tridactyla_wild	Myrmecophagidae	wild_Myrmecophagidae
10936.Myr.tri.Seat.9.04I04.653753.Giantanteater	wild	Giant anteater	Brazil	Myrmecophaga tridactyla	Myrmecophaga tridactyla_wild	Myrmecophagidae	wild_Myrmecophagidae
10936.FD.0087.aardvark	captive	Aardvark	South Africa	Orycteropus afer	Orycteropus afer_captive	Orycteropodidae	captive_Orycteropodidae
10936.FD.0088.aardvark	captive	Aardvark	South Africa	Orycteropus afer	Orycteropus afer_captive	Orycteropodidae	captive_Orycteropodidae
10936.FD.0089.aardvark	captive	Aardvark	South Africa	Orycteropus afer	Orycteropus afer_captive	Orycteropodidae	captive_Orycteropodidae
10936.FD.0090.aardvark	captive	Aardvark	South Africa	Orycteropus afer	Orycteropus afer_captive	Orycteropodidae	captive_Orycteropodidae
10936.Ory.afe.Cinci.1.653709.Aardvark	captive	Aardvark	USA	Orycteropus afer	Orycteropus afer_captive	Orycteropodidae	captive_Orycteropodidae
10936.Ory.afe.Cinci.2.653750.Aardvark	captive	Aardvark	USA	Orycteropus afer	Orycteropus afer_captive	Orycteropodidae	captive_Orycteropodidae
10936.Ory.afe.Cinci.3.653669.Aardvark	captive	Aardvark	USA	Orycteropus afer	Orycteropus afer_captive	Orycteropodidae	captive_Orycteropodidae
10936.Ory.afe.Colch.1.653716.Aardvark	captive	Aardvark	United Kingdom	Orycteropus afer	Orycteropus afer_captive	Orycteropodidae	captive_Orycteropodidae
10936.Ory.afe.Colch.2.653725.Aardvark	captive	Aardvark	United Kingdom	Orycteropus afer	Orycteropus afer_captive	Orycteropodidae	captive_Orycteropodidae
10936.Ory.afe.Colch.3.653751.Aardvark	captive	Aardvark	United Kingdom	Orycteropus afer	Orycteropus afer_captive	Orycteropodidae	captive_Orycteropodidae
10936.Ory.afe.Colch.4.653739.Aardvark	captive	Aardvark	United Kingdom	Orycteropus afer	Orycteropus afer_captive	Orycteropodidae	captive_Orycteropodidae
10936.Ory.afe.Colch.5.653694.Aardvark	captive	Aardvark	United Kingdom	Orycteropus afer	Orycteropus afer_captive	Orycteropodidae	captive_Orycteropodidae
10936.Ory.afe.Colch.6.653748.Aardvark	captive	Aardvark	United Kingdom	Orycteropus afer	Orycteropus afer_captive	Orycteropodidae	captive_Orycteropodidae
10936.Ory.afe.Colch.7.653684.Aardvark	captive	Aardvark	United Kingdom	Orycteropus afer	Orycteropus afer_captive	Orycteropodidae	captive_Orycteropodidae
10936.Ory.afe.Colch.8.653708.Aardvark	captive	Aardvark	United Kingdom	Orycteropus afer	Orycteropus afer_captive	Orycteropodidae	captive_Orycteropodidae
10936.Ory.afe.Colch.9.653707.Aardvark	captive	Aardvark	United Kingdom	Orycteropus afer	Orycteropus afer_captive	Orycteropodidae	captive_Orycteropodidae
10936.Ory.afe.Lond.1.1.653735.Aardvark	captive	Aardvark	United Kingdom	Orycteropus afer	Orycteropus afer_captive	Orycteropodidae	captive_Orycteropodidae
10936.Ory.afe.Lond.1.653689.Aardvark	captive	Aardvark	United Kingdom	Orycteropus afer	Orycteropus afer_captive	Orycteropodidae	captive_Orycteropodidae
10936.TS.135	wild	Aardvark	South Africa	Orycteropus afer	Orycteropus afer_wild	Orycteropodidae	wild_Orycteropodidae
10936.TS.137	wild	Aardvark	South Africa	Orycteropus afer	Orycteropus afer_wild	Orycteropodidae	wild_Orycteropodidae
10936.TS.174	wild	Aardvark	South Africa	Orycteropus afer	Orycteropus afer_wild	Orycteropodidae	wild_Orycteropodidae
10936.TS.174.aardvark	wild	Aardvark	South Africa	Orycteropus afer	Orycteropus afer_wild	Orycteropodidae	wild_Orycteropodidae
10936.TS.175	wild	Aardvark	South Africa	Orycteropus afer	Orycteropus afer_wild	Orycteropodidae	wild_Orycteropodidae
10936.JB12.olivebaboon	wild	Olive baboon	Ethiopia	Papio anubis	NA_wild	Cercopithecidae	wild_Cercopithecidae
10936.JB24.olivebaboon	wild	Olive baboon	Ethiopia	Papio anubis	NA_wild	Cercopithecidae	wild_Cercopithecidae
10936.JB25.olivebaboon	wild	Olive baboon	Ethiopia	Papio anubis	NA_wild	Cercopithecidae	wild_Cercopithecidae
10936.JB28.olivebaboon	wild	Olive baboon	Ethiopia	Papio anubis	NA_wild	Cercopithecidae	wild_Cercopithecidae
10936.JB30.olivebaboon	wild	Olive baboon	Ethiopia	Papio anubis	NA_wild	Cercopithecidae	wild_Cercopithecidae
10936.JB31.olivebaboon	wild	Olive baboon	Ethiopia	Papio anubis	NA_wild	Cercopithecidae	wild_Cercopithecidae
10936.JB4.olivebaboon	wild	Olive baboon	Ethiopia	Papio anubis	NA_wild	Cercopithecidae	wild_Cercopithecidae
10936.BaboonW	wild	Hamadryas baboon	Namibia	Papio hamadryas	NA_wild	Cercopithecidae	wild_Cercopithecidae
10936.JB1.hamadryasbaboon	wild	Hamadryas baboon	Ethiopia	Papio hamadryas	NA_wild	Cercopithecidae	wild_Cercopithecidae
10936.JB13.hamadryasbaboon	wild	Hamadryas baboon	Ethiopia	Papio hamadryas	NA_wild	Cercopithecidae	wild_Cercopithecidae
10936.JB15.hamadryasbaboon	wild	Hamadryas baboon	Ethiopia	Papio hamadryas	NA_wild	Cercopithecidae	wild_Cercopithecidae
10936.JB17.hamadryasbaboon	wild	Hamadryas baboon	Ethiopia	Papio hamadryas	NA_wild	Cercopithecidae	wild_Cercopithecidae
10936.JB18.hamadryasbaboon	wild	Hamadryas baboon	Ethiopia	Papio hamadryas	NA_wild	Cercopithecidae	wild_Cercopithecidae
10936.JB19.hamadryasbaboon	wild	Hamadryas baboon	Ethiopia	Papio hamadryas	NA_wild	Cercopithecidae	wild_Cercopithecidae
10936.JB26.hamadryasbaboon	wild	Hamadryas baboon	Ethiopia	Papio hamadryas	NA_wild	Cercopithecidae	wild_Cercopithecidae
10936.TS.065.baboon	wild	Chacma baboon	South Africa	Papio ursinus	NA_wild	Cercopithecidae	wild_Cercopithecidae
10936.TS.086.baboon	wild	Chacma baboon	South Africa	Papio ursinus	NA_wild	Cercopithecidae	wild_Cercopithecidae
10936.ATL.24570.warthog	captive	Warthog	USA	Phacochoerus africanus	Phacochoerus africanus_captive	Suidae	other
10936.TS.038.warthog	wild	Warthog	South Africa	Phacochoerus africanus	Phacochoerus africanus_wild	Suidae	wild_Suidae
10936.TS.040.warthog	wild	Warthog	South Africa	Phacochoerus africanus	Phacochoerus africanus_wild	Suidae	wild_Suidae
10936.TS.042.warthog	wild	Warthog	South Africa	Phacochoerus africanus	Phacochoerus africanus_wild	Suidae	wild_Suidae
10936.TS.057.warthog	wild	Warthog	South Africa	Phacochoerus africanus	Phacochoerus africanus_wild	Suidae	wild_Suidae
